# Supplementary material
Source: PubMed Central journal article supplement (PMC9589518)
Supplement: NIHMS1840682-supplement-Supplemental_Material.pdf [file NIHMS1840682-supplement-Supplemental_Material.pdf]

## Online Supplemental Materials

Table S1. Descriptive statistics ( $Mean \pm SE$ ) for non-object-oriented exploratory behaviors across age for full-term (FT) and preterm (PT) infants; Individual Behaviors = Variability of Individual Behaviors; Combined Behaviors = Variability of Combined Behaviors.

| Non-Object-Oriented Behaviors | Birth Status | Infants' Age in Months |            |            |             |            |            |            |
|-------------------------------|--------------|------------------------|------------|------------|-------------|------------|------------|------------|
|                               |              | 3 mos                  | 4 mos      | 6 mos      | 9 mos       | 12 mos     | 18 mos     | 24 mos     |
| Head Up                       | FT           | 59.48±6.16             | 62.26±4.95 | 87.50±3.12 | 93.31±6.69  | -          | -          | -          |
|                               | PT           | 44.49±6.47             | 52.09±6.64 | 75.9±4.98  | 79.03±8.24  | -          | -          | -          |
| Head in Midline               | FT           | 45.10±6.70             | 63.29±6.45 | 73.59±4.00 | 62.06±11.30 | -          | -          | -          |
|                               | PT           | 34.30±4.50             | 43.58±5.73 | 54.49±4.06 | 56.54±9.33  | -          | -          | -          |
| Both Hands in Midline         | FT           | 40.96±7.03             | 36.05±6.80 | 25.17±6.63 | 18.64±5.26  | 28.00±4.89 | 33.37±4.81 | 36.20±6.13 |
|                               | PT           | 24.40±5.84             | 24.68±5.30 | 18.82±4.18 | 15.71±4.45  | 16.49±4.21 | 27.87±5.37 | 26.17±6.00 |
| One Hand Fisted               | FT           | 26.85±3.52             | 13.86±3.82 | 13.71±3.64 | 9.66±2.76   | 4.37±1.67  | 2.45±1.74  | 2.84±1.00  |
|                               | PT           | 32.73±4.70             | 26.74±4.47 | 27.06±4.91 | 14.39±3.91  | 10.62±3.61 | 7.71±3.86  | 3.24±1.76  |
| Hand in Mouth                 | FT           | 5.89±3.02              | 4.84±1.98  | 7.79±3.01  | 0.34±0.17   | 3.55±2.36  | 3.75±2.30  | 2.54±0.94  |
|                               | PT           | 6.96±2.83              | 13.46±4.25 | 8.64±3.70  | 0.38±0.30   | 1.87±1.25  | 4.22±2.07  | 5.83±3.90  |
| Hand Touching Body            | FT           | 48.17±6.30             | 40.92±6.13 | 39.95±5.46 | 35.47±6.82  | 28.28±4.30 | 25.22±3.56 | 31.47±5.29 |
|                               | PT           | 41.22±5.74             | 33.95±5.33 | 45.12±5.64 | 33.84±6.09  | 20.00±4.10 | 23.09±4.05 | 24.02±4.34 |
| Looking at Hand               | FT           | 0.32±0.24              | 1.46±0.76  | 0.78±0.36  | 1.58±0.63   | 3.49±0.97  | 1.74±0.55  | 0.59±0.39  |
|                               | PT           | 0.30±0.17              | 1.73±1.45  | 2.37±0.69  | 2.88±0.76   | 2.49±0.73  | 1.94±0.61  | 0.76±0.28  |
| Bouts of Exploration          | FT           | 28.15±3.25             | 26.51±4.19 | 26.21±3.43 | 35.42±6.42  | 32.37±4.12 | 21.49±1.77 | 18.68±1.87 |
|                               | PT           | 25.20±3.51             | 27.59±3.84 | 28.24±3.38 | 21.22±3.10  | 26.20±4.18 | 20.10±2.39 | 17.36±2.85 |
| Individual Behaviors          | FT           | 27.53±2.27             | 31.71±2.40 | 32.83±2.50 | 34.34±2.94  | 40.34±2.35 | 21.31±1.77 | 26.94±1.72 |
|                               | PT           | 25.86±1.66             | 27.97±1.84 | 35.52±2.09 | 32.54±2.05  | 32.74±2.67 | 31.33±2.66 | 29.06±2.85 |
| Combined Behaviors            | FT           | 2.00±0.47              | 2.12±0.38  | 3.10±0.56  | 4.65±0.91   | 5.34±0.98  | 2.08±0.31  | 1.52±0.28  |
|                               | PT           | 1.50±0.29              | 2.11±0.45  | 2.89±0.39  | 3.04±0.43   | 3.32±0.61  | 2.15±0.31  | 2.05±0.46  |

Table S2. Descriptive statistics ( $Mean \pm SE$ ) for object-oriented exploratory behaviors across age for full-term (FT) and preterm (PT) infants; Individual Behaviors = Variability of Individual Behaviors; Combined Behaviors = Variability of Combined Behaviors.

| Object-Oriented Behaviors  | Birth Status | Infants' Age in Months |               |            |            |            |            |            |
|----------------------------|--------------|------------------------|---------------|------------|------------|------------|------------|------------|
|                            |              | 3 mos                  | 4 mos         | 6 mos      | 9 mos      | 12 mos     | 18 mos     | 24 mos     |
| Holding Object Unimanually | FT           | 45.74±1.11             | 36.68±2.56    | 26.97±1.77 | 28.27±2.16 | 21.70±1.45 | 21.73±1.54 | 20.40±1.86 |
|                            | PT           | 46.23±1.36             | 40.69±1.93    | 28.71±2.64 | 27.59±2.14 | 28.26±1.61 | 22.85±1.40 | 21.66±1.49 |
| Holding Object Bimanually  | FT           | 8.53±2.21              | 26.63±5.12    | 46.06±3.54 | 43.46±4.33 | 56.56±2.89 | 54.82±3.04 | 57.04±3.57 |
|                            | PT           | 7.55±2.73              | 18.61±3.87    | 42.59±5.27 | 44.81±4.28 | 43.42±3.25 | 54.16±2.78 | 55.00±3.19 |
| Object in Mouth            | FT           | 5.58±1.44              | 15.03±3.70    | 24.09±3.57 | 13.35±3.78 | 6.27±1.90  | 1.16±0.44  | 0.26±0.16  |
|                            | PT           | 6.35±2.21              | 10.84±2.38    | 22.33±3.77 | 20.20±4.62 | 9.24±1.99  | 5.62±1.61  | 1.09±0.63  |
| Object Touching Body       | FT           | 80.66±2.93             | 68.13±3.76    | 51.37±3.54 | 23.59±4.00 | 20.07±3.05 | 20.12±3.10 | 19.00±2.81 |
|                            | PT           | 69.36±3.62             | 68.44±3.53    | 49.04±4.19 | 26.97±4.24 | 15.00±2.69 | 17.59±2.77 | 22.01±4.04 |
| Looking at Object in Hand  | FT           | 2.88±1.05              | 16.11±3.24    | 21.25±2.81 | 24.55±3.94 | 41.61±3.26 | 40.71±2.25 | 48.26±2.97 |
|                            | PT           | 3.24±1.36              | 12.06±2.67    | 28.03±3.62 | 37.04±2.67 | 39.60±2.68 | 39.01±2.45 | 42.95±3.48 |
| Fingering Object           | FT           | 1.30±0.46              | 1.52±0.42     | 2.51±0.52  | 4.17±1.10  | 2.02±0.51  | 2.37±0.94  | 1.53±0.36  |
|                            | PT           | 1.12±0.44              | 2.34±0.67     | 2.43±0.47  | 2.58±0.55  | 1.88±0.55  | 2.24±0.48  | 2.39±0.74  |
| Banging Object             | FT           | 0.002±0.002            | 1.67±1.31     | 7.76±2.18  | 1.96±0.73  | 1.58±0.75  | 1.05±0.45  | 0.87±0.37  |
|                            | PT           | 0.02±0.02              | 0.0004±0.0004 | 0.64±0.28  | 2.71±1.06  | 1.71±0.54  | 1.08±0.62  | 0.74±0.31  |
| Object Manipulation        | FT           | 0.39±0.31              | 0.23±0.16     | 1.13±0.54  | 1.08±0.37  | 2.65±0.55  | 4.12±0.71  | 6.44±1.09  |
|                            | PT           | 0.22±0.22              | 0.61±0.46     | 1.63±0.36  | 1.84±0.58  | 2.15±0.58  | 2.72±0.57  | 4.37±0.97  |
| Transferring Object        | FT           | 0.02±0.02              | 0.47±0.14     | 1.22±0.18  | 1.99±0.33  | 2.60±0.43  | 2.05±0.30  | 2.20±0.39  |
|                            | PT           | 0.05±0.03              | 0.35±0.10     | 1.05±0.18  | 3.05±0.46  | 3.48±0.41  | 2.31±0.27  | 2.24±0.29  |
| Bouts of Exploration       | FT           | 13.24±1.35             | 21.22±2.22    | 40.19±3.06 | 25.26±2.14 | 29.98±1.48 | 24.26±1.38 | 29.49±1.96 |
|                            | PT           | 11.57±1.10             | 17.59±1.54    | 27.63±1.71 | 28.91±2.30 | 29.13±2.02 | 27.56±1.88 | 26.79±1.95 |
| Individual Behaviors       | FT           | 35.19±1.97             | 45.20±2.08    | 56.57±1.66 | 57.83±2.09 | 63.89±2.70 | 62.08±2.20 | 63.49±1.96 |
|                            | PT           | 29.12±2.33             | 38.89±2.42    | 56.35±2.28 | 58.64±2.32 | 57.74±1.88 | 61.97±1.82 | 63.25±2.31 |
| Combined Behaviors         | FT           | 2.05±0.34              | 4.55±0.57     | 7.53±0.60  | 6.38±0.61  | 6.10±0.67  | 5.39±0.64  | 6.20±0.57  |
|                            | PT           | 1.56±0.45              | 3.47±0.51     | 7.12±0.63  | 7.56±0.68  | 6.34±0.45  | 6.69±0.56  | 6.43±0.52  |

Table S3. Descriptive statistics (*Mean±SE*) for Bayley scores across age for full-term (FT) and preterm (PT) infants.

| Bayley Scale        | Birth Status | Infants' Age in Months |            |            |            |            |            |            |
|---------------------|--------------|------------------------|------------|------------|------------|------------|------------|------------|
|                     |              | 3 mos                  | 4 mos      | 6 mos      | 9 mos      | 12 mos     | 18 mos     | 24 mos     |
| Gross Motor         | FT           | 13.74±0.65             | 16.13±0.48 | 22.70±0.73 | 31.13±0.76 | 39.04±1.30 | 48.39±0.51 | 51.87±2.48 |
|                     | PT           | 12.33±0.58             | 14.73±0.56 | 19.77±0.90 | 28.33±1.30 | 32.53±1.89 | 39.40±3.11 | 42.90±3.46 |
| Fine Motor          | FT           | 6.43±0.49              | 10.04±0.57 | 18.78±0.58 | 23.70±0.41 | 28.39±0.43 | 34.04±0.59 | 36.91±1.73 |
|                     | PT           | 6.87±0.47              | 9.80±0.54  | 16.07±0.74 | 21.87±1.00 | 24.37±1.28 | 28.57±2.13 | 30.93±2.32 |
| Receptive Language  | FT           | 6.52±0.14              | 7.43±0.14  | 8.26±0.19  | 9.13±0.25  | 10.26±0.56 | 16.78±1.35 | 23.57±1.70 |
|                     | PT           | 6.47±0.20              | 7.23±0.18  | 7.93±0.36  | 9.10±0.40  | 9.10±0.53  | 10.23±0.92 | 16.87±1.53 |
| Expressive Language | FT           | 7.30±0.21              | 7.04±0.24  | 8.13±0.31  | 11.09±0.34 | 12.87±0.63 | 20.22±1.01 | 29.09±1.96 |
|                     | PT           | 6.40±0.37              | 6.17±0.33  | 6.63±0.42  | 9.43±0.45  | 10.57±0.68 | 15.20±1.39 | 20.87±1.86 |
| Cognitive           | FT           | 9.43±0.65              | 12.91±0.84 | 25.87±0.53 | 31.65±0.61 | 38.65±0.89 | 52.09±0.79 | 58.70±2.79 |
|                     | PT           | 9.53±0.70              | 11.77±0.74 | 22.23±0.94 | 30.13±1.23 | 32.47±1.74 | 40.37±3.06 | 47.73±3.63 |

Table S4. Estimated statistical parameters for all fixed effects in final multilevel models testing developmental trends of change with age in NOO and OO exploratory behaviors in the NOO-OO pairs of interest (includes Cohen's  $d$  effect sizes).

| Estimated Statistical Parameters                                                                                                                                                                                                                                                                                                                                                                                                                           |                                                                                                                                                                                                                                                                                                                                                                                                                                                             |
|------------------------------------------------------------------------------------------------------------------------------------------------------------------------------------------------------------------------------------------------------------------------------------------------------------------------------------------------------------------------------------------------------------------------------------------------------------|-------------------------------------------------------------------------------------------------------------------------------------------------------------------------------------------------------------------------------------------------------------------------------------------------------------------------------------------------------------------------------------------------------------------------------------------------------------|
| NOO Exploratory Behaviors                                                                                                                                                                                                                                                                                                                                                                                                                                  | OO Exploratory Behaviors                                                                                                                                                                                                                                                                                                                                                                                                                                    |
| <p><b>Both Hands in Midline</b><br/> Intercept: <math>\beta = 35.10</math>, <math>t(337) = 6.43</math>, <math>SE = 5.46</math>, <math>p &lt; .001</math>;<br/> AGE: <math>\beta = -2.25</math>, <math>t(337) = -2.44</math>, <math>SE = 0.92</math>, <math>p = .015</math>;<br/> AGE<sup>2</sup>: <math>\beta = 0.09</math>, <math>t(337) = 2.75</math>, <math>SE = 0.03</math>, <math>p = .006</math>;<br/> <math>d = 0.27</math></p>                     | <p><b>Holding Object Bimanually</b><br/> Intercept: <math>\beta = -1.75</math>, <math>t(52) = -0.50</math>, <math>SE = 3.51</math>, <math>p = .621</math>;<br/> AGE: <math>\beta = 6.73</math>, <math>t(52) = 12.22</math>, <math>SE = 0.55</math>, <math>p &lt; .001</math>;<br/> AGE<sup>2</sup>: <math>\beta = -0.19</math>, <math>t(233) = -9.80</math>, <math>SE = 0.02</math>, <math>p &lt; .001</math>;<br/> <math>d = 3.39</math></p>               |
| <p><b>One Hand Fisted</b><br/> Intercept: <math>\beta = 36.99</math>, <math>t(52) = 9.14</math>, <math>SE = 4.05</math>, <math>p &lt; .001</math>;<br/> AGE: <math>\beta = -3.35</math>, <math>t(285) = -5.78</math>, <math>SE = 0.58</math>, <math>p &lt; .001</math>;<br/> AGE<sup>2</sup>: <math>\beta = 0.08</math>, <math>t(285) = 4.53</math>, <math>SE = 0.02</math>, <math>p &lt; .001</math>;<br/> <math>d = 0.68</math></p>                      | <p><b>Holding Object Bimanually</b><br/> Intercept: <math>\beta = -1.75</math>, <math>t(52) = -0.50</math>, <math>SE = 3.51</math>, <math>p = .621</math>;<br/> AGE: <math>\beta = 6.73</math>, <math>t(52) = 12.22</math>, <math>SE = 0.55</math>, <math>p &lt; .001</math>;<br/> AGE<sup>2</sup>: <math>\beta = -0.19</math>, <math>t(233) = -9.80</math>, <math>SE = 0.02</math>, <math>p &lt; .001</math>;<br/> <math>d = 3.39</math></p>               |
| <p><b>Hand in Mouth</b><br/> Intercept: <math>\beta = 11.57</math>, <math>t(337) = 4.45</math>, <math>SE = 2.60</math>, <math>p &lt; .001</math>;<br/> AGE: <math>\beta = -1.20</math>, <math>t(337) = -2.66</math>, <math>SE = 0.45</math>, <math>p = .008</math>;<br/> AGE<sup>2</sup>: <math>\beta = 0.04</math>, <math>t(337) = 2.27</math>, <math>SE = 0.02</math>, <math>p = .024</math>;<br/> <math>d = 0.29</math></p>                             | <p><b>Object in Mouth</b><br/> Intercept: <math>\beta = 11.02</math>, <math>t(52) = 4.15</math>, <math>SE = 2.66</math>, <math>p &lt; .001</math>;<br/> AGE: <math>\beta = 0.76</math>, <math>t(285) = 1.55</math>, <math>SE = 0.49</math>, <math>p = .124</math>;<br/> AGE<sup>2</sup>: <math>\beta = -0.05</math>, <math>t(285) = -3.14</math>, <math>SE = 0.02</math>, <math>p = .002</math>;<br/> <math>d = 0.18</math></p>                             |
| <p><b>Hand Touching Body</b><br/> Intercept: <math>\beta = 52.80</math>, <math>t(52) = 10.15</math>, <math>SE = 5.20</math>, <math>p &lt; .001</math>;<br/> AGE: <math>\beta = -3.08</math>, <math>t(285) = -3.56</math>, <math>SE = 0.87</math>, <math>p &lt; .001</math>;<br/> AGE<sup>2</sup>: <math>\beta = 0.08</math>, <math>t(285) = 2.69</math>, <math>SE = 0.03</math>, <math>p = .007</math>;<br/> <math>d = 0.42</math></p>                     | <p><b>Object Touching Body</b><br/> Intercept: <math>\beta = 103.14</math>, <math>t(52) = 30.70</math>, <math>SE = 3.36</math>, <math>p &lt; .001</math>;<br/> AGE: <math>\beta = -10.73</math>, <math>t(285) = -17.57</math>, <math>SE = 0.61</math>, <math>p &lt; .001</math>;<br/> AGE<sup>2</sup>: <math>\beta = 0.31</math>, <math>t(285) = 13.59</math>, <math>SE = 0.02</math>, <math>p &lt; .001</math>;<br/> <math>d = 2.08</math></p>             |
| <p><b>Looking at Hand</b><br/> Intercept: <math>\beta = -0.52</math>, <math>t(337) = -0.75</math>, <math>SE = 0.70</math>, <math>p = .456</math>;<br/> AGE: <math>\beta = 0.49</math>, <math>t(337) = 3.72</math>, <math>SE = 0.13</math>, <math>p &lt; .001</math>;<br/> AGE<sup>2</sup>: <math>\beta = -0.02</math>, <math>t(337) = -3.97</math>, <math>SE = 0.005</math>, <math>p &lt; .001</math>;<br/> <math>d = 0.41</math></p>                      | <p><b>Looking at Object in Hand</b><br/> Intercept: <math>\beta = -8.51</math>, <math>t(52) = -3.23</math>, <math>SE = 2.64</math>, <math>p = .002</math>;<br/> AGE: <math>\beta = 5.98</math>, <math>t(285) = 10.97</math>, <math>SE = 0.54</math>, <math>p &lt; .001</math>;<br/> AGE<sup>2</sup>: <math>\beta = -0.16</math>, <math>t(285) = -7.86</math>, <math>SE = 0.02</math>, <math>p &lt; .001</math>;<br/> <math>d = 1.30</math></p>              |
| <p><b>Bouts of Exploration</b><br/> Intercept: <math>\beta = 24.36</math>, <math>t(52) = 7.31</math>, <math>SE = 3.33</math>, <math>p &lt; .001</math>;<br/> AGE: <math>\beta = 0.74</math>, <math>t(285) = 1.19</math>, <math>SE = 0.62</math>, <math>p = .235</math>;<br/> AGE<sup>2</sup>: <math>\beta = -0.04</math>, <math>t(285) = -1.98</math>, <math>SE = 0.02</math>, <math>p = .049</math>;<br/> <math>d = 0.14</math></p>                       | <p><b>Bouts of Exploration</b><br/> Intercept: <math>\beta = 11.33</math>, <math>t(337) = 5.96</math>, <math>SE = 1.90</math>, <math>p &lt; .001</math>;<br/> AGE: <math>\beta = 2.51</math>, <math>t(337) = 6.96</math>, <math>SE = 0.36</math>, <math>p &lt; .001</math>;<br/> AGE<sup>2</sup>: <math>\beta = -0.08</math>, <math>t(337) = -6.05</math>, <math>SE = 0.01</math>, <math>p &lt; .001</math>;<br/> <math>d = 0.76</math></p>                 |
| <p><b>Variability of Individual Behaviors</b><br/> Intercept: <math>\beta = 23.60</math>, <math>t(52) = 14.26</math>, <math>SE = 1.65</math>, <math>p &lt; .001</math>;<br/> AGE: <math>\beta = 1.78</math>, <math>t(285) = 5.07</math>, <math>SE = 0.35</math>, <math>p &lt; .001</math>;<br/> AGE<sup>2</sup>: <math>\beta = -0.07</math>, <math>t(285) = -4.91</math>, <math>SE = 0.01</math>, <math>p &lt; .001</math>;<br/> <math>d = 0.60</math></p> | <p><b>Variability of Individual Behaviors</b><br/> Intercept: <math>\beta = 24.80</math>, <math>t(52) = 10.94</math>, <math>SE = 2.27</math>, <math>p &lt; .001</math>;<br/> AGE: <math>\beta = 4.72</math>, <math>t(285) = 11.80</math>, <math>SE = 0.40</math>, <math>p &lt; .001</math>;<br/> AGE<sup>2</sup>: <math>\beta = -0.13</math>, <math>t(285) = -9.05</math>, <math>SE = 0.01</math>, <math>p &lt; .001</math>;<br/> <math>d = 1.40</math></p> |
| <p><b>Variability of Combined Behaviors</b></p>                                                                                                                                                                                                                                                                                                                                                                                                            | <p><b>Variability of Combined Behaviors</b></p>                                                                                                                                                                                                                                                                                                                                                                                                             |

Intercept:  $\beta = 0.58$ ,  $t(337) = 1.64$ ,  $SE = 0.35$ ,  $p = .103$ ;  
AGE:  $\beta = 0.49$ ,  $t(337) = 5.86$ ,  $SE = 0.08$ ,  $p < .001$ ;  
AGE<sup>2</sup>:  $\beta = -0.02$ ,  $t(337) = -5.83$ ,  $SE = 0.003$ ,  $p < .001$ ;  
 $d = 0.64$

Intercept:  $\beta = 1.35$ ,  $t(52) = 2.52$ ,  $SE = 0.53$ ,  $p = .015$ ;  
AGE:  $\beta = 0.76$ ,  $t(285) = 7.51$ ,  $SE = 0.10$ ,  $p < .001$ ;  
AGE<sup>2</sup>:  $\beta = -0.02$ ,  $t(285) = -6.52$ ,  $SE = 0.004$ ,  $p < .001$ ;  
 $d = 0.89$

---

Table S5. Estimated statistical parameters for all fixed effects in final multilevel models relating NOO exploration to OO exploration (includes Cohen's  $d$  effect sizes); when non-significant, STATUS variable was deleted from the final statistical models.

| NOO Exploratory Behaviors<br>(Independent Variable) | OO Exploratory Behaviors<br>(Dependent Variable) | Estimated Statistical Parameters                                                                                                                                                                                                                                                                                                                                                                                                                                                                          |
|-----------------------------------------------------|--------------------------------------------------|-----------------------------------------------------------------------------------------------------------------------------------------------------------------------------------------------------------------------------------------------------------------------------------------------------------------------------------------------------------------------------------------------------------------------------------------------------------------------------------------------------------|
| Both Hands in Midline<br>(BHM)                      | Holding Object Bimanually                        | <b>Intercept:</b> $\beta = -5.42$ , $t(52) = -1.49$ , $SE = 3.65$ , $p = .143$ ;<br><b>BHM:</b> $\beta = 0.09$ , $t(52) = 2.21$ , $SE = 0.04$ , $p = .032$ ;<br><b>AGE:</b> $\beta = 7.04$ , $t(52) = 12.65$ , $SE = 0.56$ , $p < .001$ ;<br><b>AGE<sup>2</sup>:</b> $\beta = -0.20$ , $t(182) = -10.37$ , $SE = 0.02$ , $p < .001$ ;<br>$d = 0.61$                                                                                                                                                       |
| One Hand Fisted (OF)                                | Holding Object Bimanually                        | <b>Intercept:</b> $\beta = 4.25$ , $t(52) = 1.03$ , $SE = 4.13$ , $p = .308$ ;<br><b>OF:</b> $\beta = -0.16$ , $t(234) = -3.11$ , $SE = 0.05$ , $p = .002$ ;<br><b>AGE:</b> $\beta = 6.16$ , $t(52) = 10.74$ , $SE = 0.57$ , $p < .001$ ;<br><b>AGE<sup>2</sup>:</b> $\beta = -0.17$ , $t(234) = -9.00$ , $SE = 0.02$ , $p < .001$ ;<br>$d = 0.41$                                                                                                                                                        |
| Hand in Mouth (MH)                                  | Object in Mouth                                  | <b>Intercept:</b> $\beta = 10.58$ , $t(52) = 3.84$ , $SE = 2.76$ , $p < .001$ ;<br><b>MH:</b> $\beta = 0.03$ , $t(286) = 0.50$ , $SE = 0.06$ , $p = .619$ ;<br><b>AGE:</b> $\beta = 0.80$ , $t(286) = 1.62$ , $SE = 0.50$ , $p = .107$ ;<br><b>AGE<sup>2</sup>:</b> $\beta = -0.05$ , $t(286) = -3.19$ , $SE = 0.02$ , $p = .002$ ;<br>$d = 0.06$                                                                                                                                                         |
| Hand Touching Body (HTB)                            | Object Touching Body                             | <b>Intercept:</b> $\beta = 98.65$ , $t(52) = 25.55$ , $SE = 3.86$ , $p < .001$ ;<br><b>HTB:</b> $\beta = 0.09$ , $t(286) = 2.64$ , $SE = 0.03$ , $p = .009$ ;<br><b>AGE:</b> $\beta = -10.47$ , $t(286) = -17.06$ , $SE = 0.61$ , $p < .001$ ;<br><b>AGE<sup>2</sup>:</b> $\beta = 0.30$ , $t(286) = 13.35$ , $SE = 0.02$ , $p < .001$ ;<br>$d = 0.31$                                                                                                                                                    |
| Looking at Hand (LH)                                | Looking at Object in Hand                        | <b>Intercept:</b> $\beta = -8.07$ , $t(52) = -3.30$ , $SE = 2.45$ , $p = .002$ ;<br><b>LH:</b> $\beta = 0.82$ , $t(286) = 5.35$ , $SE = 0.15$ , $p < .001$ ;<br><b>AGE:</b> $\beta = 5.55$ , $t(286) = 10.61$ , $SE = 0.52$ , $p < .001$ ;<br><b>AGE<sup>2</sup>:</b> $\beta = -0.14$ , $t(286) = -7.24$ , $SE = 0.02$ , $p < .001$ ;<br>$d = 0.63$                                                                                                                                                       |
| Bouts of Exploration (BE)                           | Bouts of Exploration                             | <b>Intercept:</b> $\beta = 5.98$ , $t(336) = 3.42$ , $SE = 1.75$ , $p < .001$ ;<br><b>BE:</b> $\beta = 0.13$ , $t(336) = 4.67$ , $SE = 0.03$ , $p < .001$ ;<br><b>STATUS:</b> $\beta = 4.52$ , $t(336) = 2.58$ , $SE = 1.75$ , $p = .010$ ;<br><b>AGE:</b> $\beta = 2.55$ , $t(336) = 7.29$ , $SE = 0.35$ , $p < .001$ ;<br><b>AGE*STATUS:</b> $\beta = -0.25$ , $t(336) = -2.24$ , $SE = 0.11$ , $p = .026$ ;<br><b>AGE<sup>2</sup>:</b> $\beta = -0.07$ , $t(336) = -5.63$ , $SE = 0.01$ , $p < .001$ ; |

*d = 0.51*

Variability of  
Individual Behaviors (IB)

Variability of  
Individual Behaviors

**Intercept:**  $\beta = 19.34, t(52) = 7.16, SE = 2.70, p < .001$ ;  
**IB:**  $\beta = 0.21, t(286) = 4.38, SE = 0.05, p < .001$ ;  
**AGE:**  $\beta = 4.41, t(286) = 11.31, SE = 0.39, p < .001$ ;  
**AGE<sup>2</sup>:**  $\beta = -0.12, t(286) = -8.49, SE = 0.01, p < .001$ ;  
*d = 0.52*

Variability of  
Combined Behaviors (CB)

Variability of  
Combined Behaviors

**Intercept:**  $\beta = 1.22, t(52) = 2.34, SE = 0.52, p = .023$ ;  
**CB:**  $\beta = 0.09, t(286) = 1.35, SE = 0.07, p = .178$ ;  
**AGE:**  $\beta = 0.73, t(286) = 6.98, SE = 0.10, p < .001$ ;  
**AGE<sup>2</sup>:**  $\beta = -0.02, t(286) = -6.01, SE = 0.004, p < .001$ ;  
*d = 0.16*

---

Table S6. Estimated statistical parameters for all fixed effects in final multilevel models relating children's NOO exploration to Bayley outcomes (includes Cohen's *d* effect sizes).

| NOO Exploratory Behaviors<br>(Independent Variable) | Bayley Scales of Infant Development (Dependent Variable)                                                                                                                                                                  |                                                                                                                                                                                                                                                                                                                                                                                                                                                                     |                                                                                                                                                                                                                                                                                                                  |                                                                                                                                                                                                                                                                                                                                                                                |                                                                                                                                                                                                                                                                                                                                                                                                                                                                   |
|-----------------------------------------------------|---------------------------------------------------------------------------------------------------------------------------------------------------------------------------------------------------------------------------|---------------------------------------------------------------------------------------------------------------------------------------------------------------------------------------------------------------------------------------------------------------------------------------------------------------------------------------------------------------------------------------------------------------------------------------------------------------------|------------------------------------------------------------------------------------------------------------------------------------------------------------------------------------------------------------------------------------------------------------------------------------------------------------------|--------------------------------------------------------------------------------------------------------------------------------------------------------------------------------------------------------------------------------------------------------------------------------------------------------------------------------------------------------------------------------|-------------------------------------------------------------------------------------------------------------------------------------------------------------------------------------------------------------------------------------------------------------------------------------------------------------------------------------------------------------------------------------------------------------------------------------------------------------------|
|                                                     | Gross Motor                                                                                                                                                                                                               | Fine Motor                                                                                                                                                                                                                                                                                                                                                                                                                                                          | Receptive Language                                                                                                                                                                                                                                                                                               | Expressive Language                                                                                                                                                                                                                                                                                                                                                            | Cognitive                                                                                                                                                                                                                                                                                                                                                                                                                                                         |
| Head Up (HU)                                        | <b>Intercept:</b> $\beta = 4.37, t(53) = 7.44, SE = 0.59, p < .001$ ;<br><b>HU:</b> $\beta = 0.04, t(57) = 5.01, SE = 0.01, p < .001$ ;<br><b>AGE:</b> $\beta = 2.33, t(53) = 16.21, SE = 0.14, p < .001$ ;<br>$d = 1.33$ | <b>Intercept:</b> $\beta = -8.72, t(52) = -5.95, SE = 1.47, p < .001$ ;<br><b>HU:</b> $\beta = 0.02, t(56) = 2.88, SE = 0.01, p = .006$ ;<br><b>STATUS:</b> $\beta = -2.04, t(52) = -1.85, SE = 1.10, p = .071$ ;<br><b>AGE:</b> $\beta = 5.74, t(52) = 10.09, SE = 0.57, p < .001$ ;<br><b>AGE*STATUS:</b> $\beta = 0.58, t(52) = 2.51, SE = 0.23, p = .015$ ;<br><b>AGE<sup>2</sup>:</b> $\beta = -0.28, t(56) = -5.72, SE = 0.05, p < .001$ ;<br>$d = 0.77$      | <b>Intercept:</b> $\beta = 4.73, t(53) = 23.36, SE = 0.20, p < .001$ ;<br><b>HU:</b> $\beta = 0.001, t(57) = 0.57, SE = 0.003, p = .572$ ;<br><b>AGE:</b> $\beta = 0.64, t(53) = 13.92, SE = 0.05, p < .001$ ;<br>$d = 0.15$                                                                                     | <b>Intercept:</b> $\beta = 4.85, t(53) = 13.15, SE = 0.36, p < .001$ ;<br><b>HU:</b> $\beta = 0.01, t(57) = 1.52, SE = 0.004, p = .134$ ;<br><b>AGE:</b> $\beta = 0.57, t(53) = 8.92, SE = 0.06, p < .001$ ;<br>$d = 0.40$                                                                                                                                                     | <b>Intercept:</b> $\beta = -14.04, t(53) = -7.17, SE = 1.96, p < .001$ ;<br><b>HU:</b> $\beta = 0.02, t(56) = 1.79, SE = 0.01, p = .079$ ;<br><b>AGE:</b> $\beta = 8.87, t(53) = 11.53, SE = 0.77, p < .001$ ;<br><b>AGE<sup>2</sup>:</b> $\beta = -0.47, t(56) = -6.97, SE = 0.07, p < .001$ ;<br>$d = 0.48$                                                                                                                                                     |
| Head in Midline (HM)                                | <b>Intercept:</b> $\beta = 4.45, t(53) = 7.19, SE = 0.62, p < .001$ ;<br><b>HM:</b> $\beta = 0.02, t(55) = 2.41, SE = 0.01, p = .019$ ;<br><b>AGE:</b> $\beta = 2.71, t(53) = 21.98, SE = 0.12, p < .001$ ;<br>$d = 0.65$ | <b>Intercept:</b> $\beta = -10.07, t(52) = -7.34, SE = 1.37, p < .001$ ;<br><b>HM:</b> $\beta = 0.01, t(106) = 1.31, SE = 0.01, p = .194$ ;<br><b>STATUS:</b> $\beta = -1.82, t(52) = -1.76, SE = 1.03, p = .084$ ;<br><b>AGE:</b> $\beta = 6.51, t(106) = 12.82, SE = 0.51, p < .001$ ;<br><b>AGE*STATUS:</b> $\beta = 0.56, t(106) = 2.80, SE = 0.20, p = .006$ ;<br><b>AGE<sup>2</sup>:</b> $\beta = -0.34, t(106) = -7.63, SE = 0.05, p < .001$ ;<br>$d = 0.25$ | <b>Intercept:</b> $\beta = 3.80, t(53) = 7.73, SE = 0.49, p < .001$ ;<br><b>HM:</b> $\beta = -0.001, t(107) = -0.29, SE = 0.003, p = .772$ ;<br><b>AGE:</b> $\beta = 1.06, t(107) = 5.71, SE = 0.19, p < .001$ ;<br><b>AGE<sup>2</sup>:</b> $\beta = -0.04, t(107) = -2.13, SE = 0.02, p = .035$ ;<br>$d = 0.06$ | <b>Intercept:</b> $\beta = 5.39, t(52) = 8.35, SE = 0.65, p < .001$ ;<br><b>HM:</b> $\beta = 0.01, t(54) = 2.30, SE = 0.003, p = .026$ ;<br><b>STATUS:</b> $\beta = 0.89, t(52) = 2.52, SE = 0.35, p = .015$ ;<br><b>AGE:</b> $\beta = 0.13, t(53) = 0.52, SE = 0.24, p = .605$ ;<br><b>AGE<sup>2</sup>:</b> $\beta = 0.05, t(54) = 2.14, SE = 0.02, p = .037$ ;<br>$d = 0.63$ | <b>Intercept:</b> $\beta = -13.67, t(52) = -6.40, SE = 2.14, p < .001$ ;<br><b>HM:</b> $\beta = -0.01, t(54) = -1.47, SE = 0.01, p = .147$ ;<br><b>STATUS:</b> $\beta = -1.83, t(52) = -1.05, SE = 1.75, p = .300$ ;<br><b>AGE:</b> $\beta = 9.25, t(52) = 13.27, SE = 0.70, p < .001$ ;<br><b>AGE*STATUS:</b> $\beta = 0.67, t(52) = 2.13, SE = 0.32, p = .038$ ;<br><b>AGE<sup>2</sup>:</b> $\beta = -0.52, t(54) = -9.40, SE = 0.06, p < .001$ ;<br>$d = 0.40$ |
| Both Hands in Midline                               | <b>Intercept:</b> $\beta = 1.37, t(52) =$                                                                                                                                                                                 | <b>Intercept:</b> $\beta = -0.90, t(52)$                                                                                                                                                                                                                                                                                                                                                                                                                            | <b>Intercept:</b> $\beta = 7.68, t(289)$                                                                                                                                                                                                                                                                         | <b>Intercept:</b> $\beta = 5.78, t(52) =$                                                                                                                                                                                                                                                                                                                                      | <b>Intercept:</b> $\beta = 1.00, t(52) =$                                                                                                                                                                                                                                                                                                                                                                                                                         |



|                      |                                                                                                                                                                                                                                                                                                                                                                                                                                                                      |                                                                                                                                                                                                                                                                                                                                                                                                                                                                                                                                                                |                                                                                                                                                                                                                                                                                                                                                                                                                                                                                                                                                                    |                                                                                                                                                                                                                                                                                                                                                                                                                                                                                                                                                          |                                                                                                                                                                                                                                                                                                                                                                                                                                                                                                                                                                |
|----------------------|----------------------------------------------------------------------------------------------------------------------------------------------------------------------------------------------------------------------------------------------------------------------------------------------------------------------------------------------------------------------------------------------------------------------------------------------------------------------|----------------------------------------------------------------------------------------------------------------------------------------------------------------------------------------------------------------------------------------------------------------------------------------------------------------------------------------------------------------------------------------------------------------------------------------------------------------------------------------------------------------------------------------------------------------|--------------------------------------------------------------------------------------------------------------------------------------------------------------------------------------------------------------------------------------------------------------------------------------------------------------------------------------------------------------------------------------------------------------------------------------------------------------------------------------------------------------------------------------------------------------------|----------------------------------------------------------------------------------------------------------------------------------------------------------------------------------------------------------------------------------------------------------------------------------------------------------------------------------------------------------------------------------------------------------------------------------------------------------------------------------------------------------------------------------------------------------|----------------------------------------------------------------------------------------------------------------------------------------------------------------------------------------------------------------------------------------------------------------------------------------------------------------------------------------------------------------------------------------------------------------------------------------------------------------------------------------------------------------------------------------------------------------|
| (BHM)                | <p>2.14, <math>SE = 0.64, p = .037</math>;<br/> <b>BHM</b>: <math>\beta = -0.01, t(238) = -0.82, SE = 0.01, p = .415</math>;<br/> <b>STATUS</b>: <math>\beta = 1.90, t(52) = 2.95, SE = 0.64, p = .005</math>;<br/> <b>AGE</b>: <math>\beta = 3.82, t(53) = 29.16, SE = 0.13, p &lt; .001</math>;<br/> <b>AGE</b><sup>2</sup>: <math>\beta = -0.07, t(238) = -16.23, SE = 0.004, p &lt; .001</math>;<br/> <i>d = 0.11</i></p>                                        | <p><math>= -1.49, SE = 0.61, p = .143</math>;<br/> <b>BHM</b>: <math>\beta = -0.01, t(290) = -1.75, SE = 0.01, p = .081</math>;<br/> <b>STATUS</b>: <math>\beta = 0.39, t(52) = 0.65, SE = 0.60, p = .519</math>;<br/> <b>AGE</b>: <math>\beta = 3.21, t(290) = 35.65, SE = 0.09, p &lt; .001</math>;<br/> <b>AGE*STATUS</b>: <math>\beta = 0.09, t(290) = 2.39, SE = 0.04, p = .018</math>;<br/> <b>AGE</b><sup>2</sup>: <math>\beta = -0.07, t(290) = -22.85, SE = 0.003, p &lt; .001</math>;<br/> <i>d = 0.21</i></p>                                       | <p><math>= 21.94, SE = 0.35, p &lt; .001</math>;<br/> <b>BHM</b>: <math>\beta = 0.01, t(53) = 0.89, SE = 0.01, p = .376</math>;<br/> <b>STATUS</b>: <math>\beta = -2.26, t(289) = -4.02, SE = 0.56, p &lt; .001</math>;<br/> <b>AGE</b>: <math>\beta = -0.08, t(289) = 1.06, SE = 0.07, p = .292</math>;<br/> <b>AGE*STATUS</b>: <math>\beta = 0.33, t(289) = 4.52, SE = 0.07, p &lt; .001</math>;<br/> <b>AGE</b><sup>2</sup>: <math>\beta = 0.02, t(289) = 7.35, SE = 0.003, p &lt; .001</math>;<br/> <i>d = 0.24</i></p>                                        | <p><math>9.34, SE = 0.62, p &lt; .001</math>;<br/> <b>BHM</b>: <math>\beta = -0.002, t(238) = -0.66, SE = 0.003, p = .513</math>;<br/> <b>STATUS</b>: <math>\beta = -0.14, t(52) = -0.25, SE = 0.57, p = .807</math>;<br/> <b>AGE</b>: <math>\beta = 0.25, t(52) = 2.41, SE = 0.11, p = .019</math>;<br/> <b>AGE*STATUS</b>: <math>\beta = 0.20, t(52) = 2.48, SE = 0.08, p = .017</math>;<br/> <b>AGE</b><sup>2</sup>: <math>\beta = 0.02, t(238) = 5.89, SE = 0.004, p &lt; .001</math>;<br/> <i>d = 0.09</i></p>                                      | <p><math>1.40, SE = 0.72, p = .167</math>;<br/> <b>BHM</b>: <math>\beta = -0.02, t(53) = -2.25, SE = 0.01, p = .028</math>;<br/> <b>STATUS</b>: <math>\beta = -0.58, t(52) = -0.79, SE = 0.74, p = .436</math>;<br/> <b>AGE</b>: <math>\beta = 3.74, t(52) = 30.98, SE = 0.12, p &lt; .001</math>;<br/> <b>AGE*STATUS</b>: <math>\beta = 0.30, t(52) = 3.92, SE = 0.08, p &lt; .001</math>;<br/> <b>AGE</b><sup>2</sup>: <math>\beta = -0.06, t(185) = -15.01, SE = 0.004, p &lt; .001</math>;<br/> <i>d = 0.62</i></p>                                        |
| One Hand Fisted (OF) | <p><b>Intercept</b>: <math>\beta = 1.55, t(52) = 1.86, SE = 0.84, p = .069</math>;<br/> <b>OF</b>: <math>\beta = -0.01, t(238) = -0.89, SE = 0.01, p = .376</math>;<br/> <b>STATUS</b>: <math>\beta = 1.77, t(52) = 2.78, SE = 0.64, p = .008</math>;<br/> <b>AGE</b>: <math>\beta = 3.80, t(53) = 26.58, SE = 0.14, p &lt; .001</math>;<br/> <b>AGE</b><sup>2</sup>: <math>\beta = -0.07, t(238) = -15.37, SE = 0.01, p &lt; .001</math>;<br/> <i>d = 0.12</i></p>  | <p><b>Intercept</b>: <math>\beta = -0.76, t(52) = -1.05, SE = 0.73, p = .301</math>;<br/> <b>OF</b>: <math>\beta = -0.01, t(290) = -1.20, SE = 0.01, p = .230</math>;<br/> <b>STATUS</b>: <math>\beta = 0.17, t(52) = 0.29, SE = 0.60, p = .773</math>;<br/> <b>AGE</b>: <math>\beta = 3.20, t(290) = 32.23, SE = 0.10, p &lt; .001</math>;<br/> <b>AGE*STATUS</b>: <math>\beta = 0.10, t(290) = 2.57, SE = 0.04, p = .011</math>;<br/> <b>AGE</b><sup>2</sup>: <math>\beta = -0.07, t(290) = -21.74, SE = 0.003, p &lt; .001</math>;<br/> <i>d = 0.14</i></p> | <p><b>Intercept</b>: <math>\beta = 7.50, t(52) = 17.01, SE = 0.44, p &lt; .001</math>;<br/> <b>OF</b>: <math>\beta = 0.001, t(290) = 0.18, SE = 0.01, p = .860</math>;<br/> <b>STATUS</b>: <math>\beta = -1.88, t(52) = -4.01, SE = 0.47, p &lt; .001</math>;<br/> <b>AGE</b>: <math>\beta = -0.04, t(290) = -0.55, SE = 0.08, p = .582</math>;<br/> <b>AGE*STATUS</b>: <math>\beta = 0.33, t(290) = 4.29, SE = 0.08, p &lt; .001</math>;<br/> <b>AGE</b><sup>2</sup>: <math>\beta = 0.02, t(290) = 6.88, SE = 0.003, p &lt; .001</math>;<br/> <i>d = 0.02</i></p> | <p><b>Intercept</b>: <math>\beta = 6.19, t(52) = 8.70, SE = 0.71, p &lt; .001</math>;<br/> <b>OF</b>: <math>\beta = -0.01, t(238) = -2.15, SE = 0.01, p = .033</math>;<br/> <b>STATUS</b>: <math>\beta = -0.30, t(52) = -0.51, SE = 0.59, p = .611</math>;<br/> <b>AGE</b>: <math>\beta = 0.22, t(52) = 1.98, SE = 0.11, p = .053</math>;<br/> <b>AGE*STATUS</b>: <math>\beta = 0.20, t(52) = 2.55, SE = 0.08, p = .014</math>;<br/> <b>AGE</b><sup>2</sup>: <math>\beta = 0.02, t(238) = 5.89, SE = 0.004, p &lt; .001</math>;<br/> <i>d = 0.28</i></p> | <p><b>Intercept</b>: <math>\beta = 0.55, t(52) = 0.53, SE = 1.04, p = .600</math>;<br/> <b>OF</b>: <math>\beta = -0.01, t(238) = -0.39, SE = 0.01, p = .700</math>;<br/> <b>STATUS</b>: <math>\beta = -0.61, t(52) = -0.85, SE = 0.72, p = .401</math>;<br/> <b>AGE</b>: <math>\beta = 3.75, t(52) = 22.31, SE = 0.17, p &lt; .001</math>;<br/> <b>AGE*STATUS</b>: <math>\beta = 0.29, t(52) = 3.71, SE = 0.08, p &lt; .001</math>;<br/> <b>AGE</b><sup>2</sup>: <math>\beta = -0.06, t(238) = -13.65, SE = 0.01, p &lt; .001</math>;<br/> <i>d = 0.05</i></p> |
| Hand in Mouth (MH)   | <p><b>Intercept</b>: <math>\beta = 1.17, t(52) = 1.73, SE = 0.68, p = .090</math>;<br/> <b>MH</b>: <math>\beta = 0.003, t(238) = -0.30, SE = 0.01, p = .762</math>;<br/> <b>STATUS</b>: <math>\beta = 1.87, t(52) = 2.96, SE = 0.63, p = .005</math>;<br/> <b>AGE</b>: <math>\beta = 3.83, t(53) = 29.15, SE = 0.13, p &lt; .001</math>;<br/> <b>AGE</b><sup>2</sup>: <math>\beta = -0.07, t(238) = -16.24, SE = 0.004, p &lt; .001</math>;<br/> <i>d = 0.04</i></p> | <p><b>Intercept</b>: <math>\beta = -1.30, t(52) = -1.99, SE = 0.65, p = .052</math>;<br/> <b>MH</b>: <math>\beta = 0.01, t(290) = 0.96, SE = 0.01, p = .337</math>;<br/> <b>STATUS</b>: <math>\beta = 0.32, t(52) = 0.53, SE = 0.60, p = .600</math>;<br/> <b>AGE</b>: <math>\beta = 3.25, t(290) = 34.72, SE = 0.09, p &lt; .001</math>;<br/> <b>AGE*STATUS</b>: <math>\beta = 0.09, t(290) = 2.42, SE = 0.04, p = .016</math>;</p>                                                                                                                           | <p><b>Intercept</b>: <math>\beta = 7.62, t(52) = 22.44, SE = 0.34, p &lt; .001</math>;<br/> <b>MH</b>: <math>\beta = -0.01, t(290) = -0.96, SE = 0.01, p = .337</math>;<br/> <b>STATUS</b>: <math>\beta = -1.91, t(52) = -4.12, SE = 0.46, p &lt; .001</math>;<br/> <b>AGE</b>: <math>\beta = -0.06, t(290) = -0.75, SE = 0.07, p = .454</math>;<br/> <b>AGE*STATUS</b>: <math>\beta = 0.33, t(290) = 4.30, SE = 0.08, p &lt; .001</math>;</p>                                                                                                                     | <p><b>Intercept</b>: <math>\beta = 5.88, t(52) = 9.72, SE = 0.61, p &lt; .001</math>;<br/> <b>MH</b>: <math>\beta = -0.01, t(238) = -1.66, SE = 0.01, p = .100</math>;<br/> <b>STATUS</b>: <math>\beta = -0.21, t(52) = -0.36, SE = 0.58, p = .722</math>;<br/> <b>AGE</b>: <math>\beta = 0.24, t(52) = 2.33, SE = 0.10, p = .024</math>;<br/> <b>AGE*STATUS</b>: <math>\beta = 0.20, t(52) = 2.51, SE = 0.08, p = .015</math>;</p>                                                                                                                      | <p><b>Intercept</b>: <math>\beta = 0.52, t(290) = 0.60, SE = 0.87, p = .552</math>;<br/> <b>MH</b>: <math>\beta = -0.01, t(290) = -0.48, SE = 0.02, p = .632</math>;<br/> <b>STATUS</b>: <math>\beta = -0.63, t(290) = -0.93, SE = 0.68, p = .355</math>;<br/> <b>AGE</b>: <math>\beta = 3.74, t(52) = 24.12, SE = 0.16, p &lt; .001</math>;<br/> <b>AGE*STATUS</b>: <math>\beta = 0.29, t(52) = 3.91, SE = 0.07, p &lt; .001</math>;</p>                                                                                                                      |

|                           |                                                                                                                                                                                                                                                                                                                                                                                        |                                                                                                                                                                                                                                                                                                                                                                                                                                                                       |                                                                                                                                                                                                                                                                                                                                                                                                                                                                      |                                                                                                                                                                                                                                                                                                                                                                                                                                                                    |                                                                                                                                                                                                                                                                                                                                                                                                                                                                   |
|---------------------------|----------------------------------------------------------------------------------------------------------------------------------------------------------------------------------------------------------------------------------------------------------------------------------------------------------------------------------------------------------------------------------------|-----------------------------------------------------------------------------------------------------------------------------------------------------------------------------------------------------------------------------------------------------------------------------------------------------------------------------------------------------------------------------------------------------------------------------------------------------------------------|----------------------------------------------------------------------------------------------------------------------------------------------------------------------------------------------------------------------------------------------------------------------------------------------------------------------------------------------------------------------------------------------------------------------------------------------------------------------|--------------------------------------------------------------------------------------------------------------------------------------------------------------------------------------------------------------------------------------------------------------------------------------------------------------------------------------------------------------------------------------------------------------------------------------------------------------------|-------------------------------------------------------------------------------------------------------------------------------------------------------------------------------------------------------------------------------------------------------------------------------------------------------------------------------------------------------------------------------------------------------------------------------------------------------------------|
|                           |                                                                                                                                                                                                                                                                                                                                                                                        | $AGE^2: \beta = -0.07, t(290) = -22.79, SE = 0.003, p < .001; d = 0.11$                                                                                                                                                                                                                                                                                                                                                                                               | $AGE^2: \beta = 0.02, t(290) = 7.18, SE = 0.003, p < .001; d = 0.11$                                                                                                                                                                                                                                                                                                                                                                                                 | $AGE^2: \beta = 0.02, t(238) = 6.03, SE = 0.004, p < .001; d = 0.22$                                                                                                                                                                                                                                                                                                                                                                                               | $AGE^2: \beta = -0.06, t(290) = -13.93, SE = 0.01, p < .001; d = 0.06$                                                                                                                                                                                                                                                                                                                                                                                            |
| Hand Touching Body (HTB)  | <b>Intercept:</b> $\beta = 2.16, t(52) = 3.38, SE = 0.64, p = .001$ ;<br><b>HTB:</b> $\beta = -0.02, t(238) = -3.29, SE = 0.01, p = .001$ ;<br><b>STATUS:</b> $\beta = 1.88, t(52) = 2.94, SE = 0.64, p = .005$ ;<br><b>AGE:</b> $\beta = 3.77, t(53) = 41.43, SE = 0.09, p < .001$ ;<br><b>AGE<sup>2</sup>:</b> $\beta = -0.07, t(238) = -22.41, SE = 0.003, p < .001$<br>$d = 0.43$  | <b>Intercept:</b> $\beta = -0.75, t(52) = -1.21, SE = 0.62, p = .232$ ;<br><b>HTB:</b> $\beta = -0.01, t(290) = -1.65, SE = 0.01, p = .100$ ;<br><b>STATUS:</b> $\beta = 0.31, t(52) = 0.51, SE = 0.60, p = .611$ ;<br><b>AGE:</b> $\beta = 3.21, t(290) = 35.55, SE = 0.09, p < .001$ ;<br><b>AGE*STATUS:</b> $\beta = 0.09, t(290) = 2.49, SE = 0.04, p = .013$ ;<br><b>AGE<sup>2</sup>:</b> $\beta = -0.07, t(290) = -23.28, SE = 0.003, p < .001$ ;<br>$d = 0.19$ | <b>Intercept:</b> $\beta = 7.36, t(52) = 21.78, SE = 0.34, p < .001$ ;<br><b>HTB:</b> $\beta = 0.003, t(290) = 0.75, SE = 0.004, p = .456$ ;<br><b>STATUS:</b> $\beta = -1.90, t(52) = -4.04, SE = 0.47, p < .001$ ;<br><b>AGE:</b> $\beta = -0.04, t(290) = -0.52, SE = 0.07, p = .605$ ;<br><b>AGE*STATUS:</b> $\beta = 0.33, t(290) = 4.28, SE = 0.08, p < .001$ ;<br><b>AGE<sup>2</sup>:</b> $\beta = 0.02, t(290) = 7.27, SE = 0.003, p < .001$ ;<br>$d = 0.09$ | <b>Intercept:</b> $\beta = 5.93, t(52) = 10.32, SE = 0.57, p < .001$ ;<br><b>HTB:</b> $\beta = -0.004, t(238) = -1.23, SE = 0.003, p = .222$ ;<br><b>STATUS:</b> $\beta = -0.15, t(52) = -0.27, SE = 0.58, p = .791$ ;<br><b>AGE:</b> $\beta = 0.25, t(52) = 2.44, SE = 0.10, p = .018$ ;<br><b>AGE*STATUS:</b> $\beta = 0.20, t(52) = 2.49, SE = 0.08, p < .016$ ;<br><b>AGE<sup>2</sup>:</b> $\beta = 0.02, t(238) = 6.15, SE = 0.004, p < .001$ ;<br>$d = 0.16$ | <b>Intercept:</b> $\beta = 0.42, t(52) = .46, SE = 0.92, p = .647$ ;<br><b>HTB:</b> $\beta = 0.001, t(53) = 0.08, SE = 0.01, p = .937$ ;<br><b>STATUS:</b> $\beta = -0.73, t(52) = -1.04, SE = 0.70, p = .302$ ;<br><b>AGE:</b> $\beta = 3.77, t(52) = 24.41, SE = 0.15, p < .001$ ;<br><b>AGE*STATUS:</b> $\beta = 0.30, t(52) = 4.04, SE = 0.07, p < .001$ ;<br><b>AGE<sup>2</sup>:</b> $\beta = -0.06, t(185) = -14.39, SE = 0.004, p < .001$ ;<br>$d = 0.02$  |
| Looking at Hand (LH)      | <b>Intercept:</b> $\beta = 1.21, t(52) = 1.79, SE = 0.67, p = .080$ ;<br><b>LH:</b> $\beta = -0.004, t(238) = -0.11, SE = 0.03, p = .910$ ;<br><b>STATUS:</b> $\beta = 1.86, t(52) = 2.94, SE = 0.63, p = .005$ ;<br><b>AGE:</b> $\beta = 3.83, t(53) = 28.25, SE = 0.14, p < .001$ ;<br><b>AGE<sup>2</sup>:</b> $\beta = -0.07, t(238) = -15.65, SE = 0.01, p < .001$ ;<br>$d = 0.01$ | <b>Intercept:</b> $\beta = -1.15, t(52) = -1.94, SE = 0.60, p = .058$ ;<br><b>LH:</b> $\beta = 0.07, t(290) = 1.33, SE = 0.05, p = .183$ ;<br><b>STATUS:</b> $\beta = 0.33, t(52) = 0.58, SE = 0.58, p = .565$ ;<br><b>AGE:</b> $\beta = 3.20, t(290) = 32.70, SE = 0.10, p < .001$ ;<br><b>AGE*STATUS:</b> $\beta = 0.09, t(290) = 2.45, SE = 0.04, p = .015$ ;<br><b>AGE<sup>2</sup>:</b> $\beta = -0.07, t(290) = -21.11, SE = 0.003, p < .001$ ;<br>$d = 0.16$    | <b>Intercept:</b> $\beta = 7.53, t(52) = 22.36, SE = 0.34, p < .001$ ;<br><b>LH:</b> $\beta = -0.01, t(290) = -0.68, SE = 0.02, p = .496$ ;<br><b>STATUS:</b> $\beta = -1.90, t(52) = -4.07, SE = 0.47, p < .001$ ;<br><b>AGE:</b> $\beta = -0.04, t(290) = -0.55, SE = 0.07, p = .584$ ;<br><b>AGE*STATUS:</b> $\beta = 0.33, t(290) = 4.29, SE = 0.08, p < .001$ ;<br><b>AGE<sup>2</sup>:</b> $\beta = 0.02, t(290) = 7.13, SE = 0.003, p < .001$ ;<br>$d = 0.08$  | <b>Intercept:</b> $\beta = 5.71, t(52) = 9.67, SE = 0.59, p < .001$ ;<br><b>LH:</b> $\beta = -0.04, t(238) = -1.42, SE = 0.02, p = .156$ ;<br><b>STATUS:</b> $\beta = -0.18, t(52) = -0.31, SE = 0.57, p = .755$ ;<br><b>AGE:</b> $\beta = 0.28, t(52) = 2.68, SE = 0.10, p = .010$ ;<br><b>AGE*STATUS:</b> $\beta = 0.20, t(52) = 2.48, SE = 0.08, p = .016$ ;<br><b>AGE<sup>2</sup>:</b> $\beta = 0.02, t(238) = 5.74, SE = 0.004, p < .001$ ;<br>$d = 0.18$     | <b>Intercept:</b> $\beta = 0.34, t(52) = 0.38, SE = 0.90, p = .706$ ;<br><b>LH:</b> $\beta = -0.01, t(238) = -0.26, SE = 0.05, p = .796$ ;<br><b>STATUS:</b> $\beta = -0.56, t(52) = -0.81, SE = 0.70, p = .424$ ;<br><b>AGE:</b> $\beta = 3.77, t(52) = 22.85, SE = 0.17, p < .001$ ;<br><b>AGE*STATUS:</b> $\beta = 0.28, t(52) = 3.80, SE = 0.07, p < .001$ ;<br><b>AGE<sup>2</sup>:</b> $\beta = -0.06, t(238) = -13.17, SE = 0.01, p < .001$ ;<br>$d = 0.03$ |
| Bouts of Exploration (BE) | <b>Intercept:</b> $\beta = 1.26, t(52) = 1.73, SE = 0.73, p = .090$ ;<br><b>BE:</b> $\beta = -0.002, t(238) = -0.25, SE = 0.01, p = .806$ ;<br><b>STATUS:</b> $\beta = 1.86, t(52) = 2.96, SE = 0.63, p = .005$ ;                                                                                                                                                                      | <b>Intercept:</b> $\beta = -1.09, t(52) = -1.78, SE = 0.61, p = .080$ ;<br><b>BE:</b> $\beta = -0.003, t(290) = -0.43, SE = 0.01, p = .670$ ;<br><b>STATUS:</b> $\beta = 0.30, t(52) =$                                                                                                                                                                                                                                                                               | <b>Intercept:</b> $\beta = 7.49, t(52) = 19.57, SE = 0.38, p < .001$ ;<br><b>BE:</b> $\beta = 0.002, t(290) = 0.37, SE = 0.01, p = .711$ ;<br><b>STATUS:</b> $\beta = -1.90, t(52) = -4.11, SE = 0.46, p <$                                                                                                                                                                                                                                                          | <b>Intercept:</b> $\beta = 5.52, t(52) = 8.76, SE = 0.63, p < .001$ ;<br><b>BE:</b> $\beta = 0.01, t(238) = 1.63, SE = 0.01, p = .105$ ;<br><b>STATUS:</b> $\beta = -0.19, t(52) = -0.33, SE = 0.57, p =$                                                                                                                                                                                                                                                          | <b>Intercept:</b> $\beta = 0.07, t(52) = 0.08, SE = 0.97, p = .939$ ;<br><b>BE:</b> $\beta = 0.01, t(238) = 1.02, SE = 0.01, p = .309$ ;<br><b>STATUS:</b> $\beta = -0.58, t(52) = -0.84, SE = 0.70, p =$                                                                                                                                                                                                                                                         |

|                                          |                                                                                                                                                                                                                                                                                                                                                                                                                                                                   |                                                                                                                                                                                                                                                                                                                                                                                                                                                                                                                                                                 |                                                                                                                                                                                                                                                                                                                                                                                                                                                                                                                                                                     |                                                                                                                                                                                                                                                                                                                                                                                                                                                                                                                                                             |                                                                                                                                                                                                                                                                                                                                                                                                                                                                                                                                                                  |
|------------------------------------------|-------------------------------------------------------------------------------------------------------------------------------------------------------------------------------------------------------------------------------------------------------------------------------------------------------------------------------------------------------------------------------------------------------------------------------------------------------------------|-----------------------------------------------------------------------------------------------------------------------------------------------------------------------------------------------------------------------------------------------------------------------------------------------------------------------------------------------------------------------------------------------------------------------------------------------------------------------------------------------------------------------------------------------------------------|---------------------------------------------------------------------------------------------------------------------------------------------------------------------------------------------------------------------------------------------------------------------------------------------------------------------------------------------------------------------------------------------------------------------------------------------------------------------------------------------------------------------------------------------------------------------|-------------------------------------------------------------------------------------------------------------------------------------------------------------------------------------------------------------------------------------------------------------------------------------------------------------------------------------------------------------------------------------------------------------------------------------------------------------------------------------------------------------------------------------------------------------|------------------------------------------------------------------------------------------------------------------------------------------------------------------------------------------------------------------------------------------------------------------------------------------------------------------------------------------------------------------------------------------------------------------------------------------------------------------------------------------------------------------------------------------------------------------|
|                                          | <p><b>AGE:</b> <math>\beta = 3.83, t(53) = 29.11, SE = 0.13, p &lt; .001</math>;<br/> <b>AGE<sup>2</sup>:</b> <math>\beta = -0.07, t(238) = -16.28, SE = 0.004, p &lt; .001</math>;<br/> <i>d</i> = 0.03</p>                                                                                                                                                                                                                                                      | <p>0.51, <i>SE</i> = 0.60, <i>p</i> = .615;<br/> <b>AGE:</b> <math>\beta = 3.24, t(290) = 35.36, SE = 0.09, p &lt; .001</math>;<br/> <b>AGE*STATUS:</b> <math>\beta = 0.09, t(290) = 2.44, SE = 0.04, p &lt; .015</math>;<br/> <b>AGE<sup>2</sup>:</b> <math>\beta = -0.07, t(290) = -22.98, SE = 0.003, p &lt; .001</math>;<br/> <i>d</i> = 0.05</p>                                                                                                                                                                                                           | <p>.001;<br/> <b>AGE:</b> <math>\beta = -0.05, t(290) = -0.65, SE = 0.07, p = .515</math>;<br/> <b>AGE*STATUS:</b> <math>\beta = 0.33, t(290) = 4.29, SE = 0.08, p &lt; .001</math>;<br/> <b>AGE<sup>2</sup>:</b> <math>\beta = 0.02, t(290) = 7.04, SE = 0.003, p &lt; .001</math>;<br/> <i>d</i> = 0.04</p>                                                                                                                                                                                                                                                       | <p>.747;<br/> <b>AGE:</b> <math>\beta = 0.25, t(52) = 2.46, SE = 0.10, p = .017</math>;<br/> <b>AGE*STATUS:</b> <math>\beta = 0.20, t(52) = 2.47, SE = 0.08, p = .017</math>;<br/> <b>AGE<sup>2</sup>:</b> <math>\beta = 0.02, t(238) = 5.98, SE = 0.004, p &lt; .001</math>;<br/> <i>d</i> = 0.21</p>                                                                                                                                                                                                                                                      | <p>.407;<br/> <b>AGE:</b> <math>\beta = 3.76, t(52) = 23.89, SE = 0.16, p &lt; .001</math>;<br/> <b>AGE*STATUS:</b> <math>\beta = 0.28, t(52) = 3.77, SE = 0.08, p &lt; .001</math>;<br/> <b>AGE<sup>2</sup>:</b> <math>\beta = -0.06, t(238) = -14.12, SE = 0.004, p &lt; .001</math>;<br/> <i>d</i> = 0.13</p>                                                                                                                                                                                                                                                 |
| Variability of Individual Behaviors (IB) | <p><b>Intercept:</b> <math>\beta = 0.75, t(52) = 1.09, SE = 0.69, p = .282</math>;<br/> <b>IB:</b> <math>\beta = 0.02, t(238) = 1.49, SE = 0.01, p = .138</math>;<br/> <b>STATUS:</b> <math>\beta = 1.82, t(52) = 2.91, SE = 0.62, p = .005</math>;<br/> <b>AGE:</b> <math>\beta = 3.80, t(53) = 28.03, SE = 0.14, p &lt; .001</math>;<br/> <b>AGE<sup>2</sup>:</b> <math>\beta = -0.07, t(238) = -15.33, SE = 0.01, p &lt; .001</math>;<br/> <i>d</i> = 0.19</p> | <p><b>Intercept:</b> <math>\beta = -1.40, t(52) = -2.10, SE = 0.67, p = .041</math>;<br/> <b>IB:</b> <math>\beta = 0.01, t(290) = 0.86, SE = 0.01, p = .390</math>;<br/> <b>STATUS:</b> <math>\beta = 0.27, t(52) = 0.44, SE = 0.60, p = .661</math>;<br/> <b>AGE:</b> <math>\beta = 3.22, t(290) = 34.62, SE = 0.09, p &lt; .001</math>;<br/> <b>AGE*STATUS:</b> <math>\beta = 0.09, t(290) = 2.43, SE = 0.04, p = .016</math>;<br/> <b>AGE<sup>2</sup>:</b> <math>\beta = -0.07, t(290) = -22.80, SE = 0.003, p &lt; .001</math>;<br/> <i>d</i> = 0.10</p>    | <p><b>Intercept:</b> <math>\beta = 7.77, t(52) = 16.63, SE = 0.47, p &lt; .001</math>;<br/> <b>IB:</b> <math>\beta = -0.01, t(290) = -0.87, SE = 0.01, p = .384</math>;<br/> <b>STATUS:</b> <math>\beta = -1.87, t(52) = -4.08, SE = 0.46, p &lt; .001</math>;<br/> <b>AGE:</b> <math>\beta = -0.03, t(290) = -0.37, SE = 0.08, p = .712</math>;<br/> <b>AGE*STATUS:</b> <math>\beta = 0.33, t(290) = 4.30, SE = 0.08, p &lt; .001</math>;<br/> <b>AGE<sup>2</sup>:</b> <math>\beta = 0.02, t(290) = 6.64, SE = 0.003, p &lt; .001</math>;<br/> <i>d</i> = 0.10</p> | <p><b>Intercept:</b> <math>\beta = 5.72, t(52) = 8.87, SE = 0.65, p &lt; .001</math>;<br/> <b>IB:</b> <math>\beta = -0.0003, t(238) = -0.03, SE = 0.01, p = .976</math>;<br/> <b>STATUS:</b> <math>\beta = -0.16, t(52) = -0.28, SE = 0.57, p = .777</math>;<br/> <b>AGE:</b> <math>\beta = 0.26, t(52) = 2.46, SE = 0.11, p = .017</math>;<br/> <b>AGE*STATUS:</b> <math>\beta = 0.20, t(52) = 2.49, SE = 0.08, p = .016</math>;<br/> <b>AGE<sup>2</sup>:</b> <math>\beta = 0.02, t(238) = 5.76, SE = 0.004, p &lt; .001</math>;<br/> <i>d</i> = 0.004</p> | <p><b>Intercept:</b> <math>\beta = -0.23, t(290) = -0.30, SE = 0.77, p = .763</math>;<br/> <b>IB:</b> <math>\beta = 0.03, t(290) = 1.71, SE = 0.02, p = .088</math>;<br/> <b>STATUS:</b> <math>\beta = -0.70, t(290) = -1.06, SE = 0.66, p = .292</math>;<br/> <b>AGE:</b> <math>\beta = 3.70, t(52) = 28.93, SE = 0.13, p &lt; .001</math>;<br/> <b>AGE*STATUS:</b> <math>\beta = 0.29, t(52) = 4.17, SE = 0.07, p &lt; .001</math>;<br/> <b>AGE<sup>2</sup>:</b> <math>\beta = -0.06, t(290) = -13.54, SE = 0.01, p &lt; .001</math>;<br/> <i>d</i> = 0.20</p> |
| Variability of Combined Behaviors (CB)   | <p><b>Intercept:</b> <math>\beta = 1.19, t(52) = 1.79, SE = 0.67, p = .080</math>;<br/> <b>CB:</b> <math>\beta = 0.04, t(238) = 0.83, SE = 0.06, p = .407</math>;<br/> <b>STATUS:</b> <math>\beta = 1.82, t(52) = 2.94, SE = 0.62, p = .005</math>;<br/> <b>AGE:</b> <math>\beta = 3.81, t(53) = 28.11, SE = 0.14, p &lt; .001</math>;<br/> <b>AGE<sup>2</sup>:</b> <math>\beta = -0.07, t(238) = -15.62, SE = 0.01, p &lt; .001</math>;<br/> <i>d</i> = 0.11</p> | <p><b>Intercept:</b> <math>\beta = -1.17, t(52) = -1.94, SE = 0.61, p = .060</math>;<br/> <b>CB:</b> <math>\beta = -0.002, t(290) = -0.05, SE = 0.04, p = .959</math>;<br/> <b>STATUS:</b> <math>\beta = 0.29, t(52) = 0.49, SE = 0.60, p = .626</math>;<br/> <b>AGE:</b> <math>\beta = 3.24, t(290) = 34.49, SE = 0.09, p &lt; .001</math>;<br/> <b>AGE*STATUS:</b> <math>\beta = 0.09, t(290) = 2.42, SE = 0.04, p = .016</math>;<br/> <b>AGE<sup>2</sup>:</b> <math>\beta = -0.07, t(290) = -22.49, SE = 0.003, p &lt; .001</math>;<br/> <i>d</i> = 0.01</p> | <p><b>Intercept:</b> <math>\beta = 7.53, t(52) = 22.30, SE = 0.34, p &lt; .001</math>;<br/> <b>CB:</b> <math>\beta = 0.01, t(290) = 0.32, SE = 0.05, p = .747</math>;<br/> <b>STATUS:</b> <math>\beta = -1.91, t(52) = -4.09, SE = 0.47, p &lt; .001</math>;<br/> <b>AGE:</b> <math>\beta = -0.05, t(290) = -0.69, SE = 0.08, p = .492</math>;<br/> <b>AGE*STATUS:</b> <math>\beta = 0.33, t(290) = 4.29, SE = 0.08, p &lt; .001</math>;<br/> <b>AGE<sup>2</sup>:</b> <math>\beta = 0.02, t(290) = 6.71, SE = 0.004, p &lt; .001</math>;<br/> <i>d</i> = 0.04</p>   | <p><b>Intercept:</b> <math>\beta = 5.72, t(52) = 9.68, SE = 0.59, p &lt; .001</math>;<br/> <b>CB:</b> <math>\beta = -0.01, t(238) = -0.34, SE = 0.04, p = .734</math>;<br/> <b>STATUS:</b> <math>\beta = -0.15, t(52) = -0.27, SE = 0.57, p = .790</math>;<br/> <b>AGE:</b> <math>\beta = 0.26, t(52) = 2.48, SE = 0.10, p = .016</math>;<br/> <b>AGE*STATUS:</b> <math>\beta = 0.20, t(52) = 2.48, SE = 0.08, p = .016</math>;<br/> <b>AGE<sup>2</sup>:</b> <math>\beta = 0.02, t(238) = 5.63, SE = 0.004, p &lt; .001</math>;<br/> <i>d</i> = 0.04</p>    | <p><b>Intercept:</b> <math>\beta = 0.31, t(53) = 0.35, SE = 0.90, p = .729</math>;<br/> <b>CB:</b> <math>\beta = 0.14, t(238) = 2.09, SE = 0.07, p = .038</math>;<br/> <b>STATUS:</b> <math>\beta = -0.68, t(52) = -0.96, SE = 0.71, p = .341</math>;<br/> <b>AGE:</b> <math>\beta = 3.70, t(52) = 23.22, SE = 0.16, p &lt; .001</math>;<br/> <b>AGE*STATUS:</b> <math>\beta = 0.29, t(52) = 3.86, SE = 0.07, p &lt; .001</math>;<br/> <b>AGE<sup>2</sup>:</b> <math>\beta = -0.06, t(238) = -13.07, SE = 0.01, p &lt; .001</math>;<br/> <i>d</i> = 0.27</p>     |

Table S7. Estimated statistical parameters for all fixed effects in final multilevel models relating children's OO exploration to Bayley outcomes (includes Cohen's *d* effect sizes).

| NOO Exploratory Behaviors<br>(Independent Variable) | Bayley Scales of Infant Development (Dependent Variable)                                                                                                                                                                                                                                                                                                                                                                            |                                                                                                                                                                                                                                                                                                                                                                                                                                                                                                                           |                                                                                                                                                                                                                                                                                                                                                                                                                                                                                                                            |                                                                                                                                                                                                                                                                                                                                                                                                                                                                                                                        |                                                                                                                                                                                                                                                                                                                                                                                                                                                                                                                             |
|-----------------------------------------------------|-------------------------------------------------------------------------------------------------------------------------------------------------------------------------------------------------------------------------------------------------------------------------------------------------------------------------------------------------------------------------------------------------------------------------------------|---------------------------------------------------------------------------------------------------------------------------------------------------------------------------------------------------------------------------------------------------------------------------------------------------------------------------------------------------------------------------------------------------------------------------------------------------------------------------------------------------------------------------|----------------------------------------------------------------------------------------------------------------------------------------------------------------------------------------------------------------------------------------------------------------------------------------------------------------------------------------------------------------------------------------------------------------------------------------------------------------------------------------------------------------------------|------------------------------------------------------------------------------------------------------------------------------------------------------------------------------------------------------------------------------------------------------------------------------------------------------------------------------------------------------------------------------------------------------------------------------------------------------------------------------------------------------------------------|-----------------------------------------------------------------------------------------------------------------------------------------------------------------------------------------------------------------------------------------------------------------------------------------------------------------------------------------------------------------------------------------------------------------------------------------------------------------------------------------------------------------------------|
|                                                     | Gross Motor                                                                                                                                                                                                                                                                                                                                                                                                                         | Fine Motor                                                                                                                                                                                                                                                                                                                                                                                                                                                                                                                | Receptive Language                                                                                                                                                                                                                                                                                                                                                                                                                                                                                                         | Expressive Language                                                                                                                                                                                                                                                                                                                                                                                                                                                                                                    | Cognitive                                                                                                                                                                                                                                                                                                                                                                                                                                                                                                                   |
| Holding Object Unimanually (HOU)                    | <b>Intercept:</b> $\beta = 1.76$ , $t(51) = 1.47$ , $SE = 1.20$ , $p = .148$ ;<br><b>HOU:</b> $\beta = -0.01$ , $t(238) = -0.46$ , $SE = 0.02$ , $p = .649$ ;<br><b>STATUS:</b> $\beta = 1.93$ , $t(51) = 2.95$ , $SE = 0.65$ , $p = .005$ ;<br><b>AGE:</b> $\beta = 3.66$ , $t(52) = 25.76$ , $SE = 0.14$ , $p < .001$ ;<br><b>AGE<sup>2</sup>:</b> $\beta = -0.07$ , $t(238) = -13.90$ , $SE = 0.01$ , $p < .001$ ;<br>$d = 0.06$ | <b>Intercept:</b> $\beta = 1.94$ , $t(51) = 1.90$ , $SE = 1.02$ , $p = .063$ ;<br><b>HOU:</b> $\beta = -0.06$ , $t(289) = -4.28$ , $SE = 0.02$ , $p < .001$ ;<br><b>STATUS:</b> $\beta = 0.18$ , $t(51) = 0.35$ , $SE = 0.52$ , $p = .728$ ;<br><b>AGE:</b> $\beta = 2.99$ , $t(289) = 28.67$ , $SE = 0.10$ , $p < .001$ ;<br><b>AGE*STATUS:</b> $\beta = 0.10$ , $t(289) = 2.49$ , $SE = 0.04$ , $p = .013$ ;<br><b>AGE<sup>2</sup>:</b> $\beta = -0.06$ , $t(289) = -19.42$ , $SE = 0.003$ , $p < .001$ ;<br>$d = 0.50$ | <b>Intercept:</b> $\beta = 8.67$ , $t(51) = 11.13$ , $SE = 0.78$ , $p < .001$ ;<br><b>HOU:</b> $\beta = -0.02$ , $t(289) = -1.32$ , $SE = 0.01$ , $p = .186$ ;<br><b>STATUS:</b> $\beta = -1.69$ , $t(51) = -3.37$ , $SE = 0.50$ , $p = .001$ ;<br><b>AGE:</b> $\beta = -0.27$ , $t(289) = -2.68$ , $SE = 0.10$ , $p = .008$ ;<br><b>AGE*STATUS:</b> $\beta = 0.29$ , $t(289) = 3.57$ , $SE = 0.08$ , $p < .001$ ;<br><b>AGE<sup>2</sup>:</b> $\beta = 0.03$ , $t(289) = 7.30$ , $SE = 0.004$ , $p < .001$ ;<br>$d = 0.16$ | <b>Intercept:</b> $\beta = 5.09$ , $t(289) = 5.00$ , $SE = 1.02$ , $p < .001$ ;<br><b>HOU:</b> $\beta = 0.01$ , $t(289) = 0.75$ , $SE = 0.01$ , $p = .455$ ;<br><b>STATUS:</b> $\beta = -0.37$ , $t(289) = -0.62$ , $SE = 0.60$ , $p = .535$ ;<br><b>AGE:</b> $\beta = 0.17$ , $t(51) = 1.13$ , $SE = 0.15$ , $p = .265$ ;<br><b>AGE*STATUS:</b> $\beta = 0.22$ , $t(51) = 2.59$ , $SE = 0.09$ , $p = .012$ ;<br><b>AGE<sup>2</sup>:</b> $\beta = 0.03$ , $t(289) = 4.66$ , $SE = 0.01$ , $p < .001$ ;<br>$d = 0.09$   | <b>Intercept:</b> $\beta = 1.08$ , $t(289) = 0.97$ , $SE = 1.11$ , $p = .331$ ;<br><b>HOU:</b> $\beta = -0.05$ , $t(289) = -2.32$ , $SE = 0.02$ , $p = .021$ ;<br><b>STATUS:</b> $\beta = -0.28$ , $t(289) = -0.39$ , $SE = 0.72$ , $p = .697$ ;<br><b>AGE:</b> $\beta = 3.85$ , $t(51) = 26.77$ , $SE = 0.14$ , $p < .001$ ;<br><b>AGE*STATUS:</b> $\beta = 0.29$ , $t(51) = 3.93$ , $SE = 0.07$ , $p < .001$ ;<br><b>AGE<sup>2</sup>:</b> $\beta = -0.06$ , $t(289) = -14.83$ , $SE = 0.004$ , $p < .001$ ;<br>$d = 0.27$ |
| Holding Object Bimanually (HOB)                     | <b>Intercept:</b> $\beta = 1.33$ , $t(51) = 1.88$ , $SE = 0.70$ , $p = .066$ ;<br><b>HOB:</b> $\beta = 0.004$ , $t(238) = 0.43$ , $SE = 0.01$ , $p = .669$ ;<br><b>STATUS:</b> $\beta = 1.93$ , $t(51) = 2.95$ , $SE = 0.65$ , $p = .005$ ;<br><b>AGE:</b> $\beta = 3.66$ , $t(52) = 25.75$ , $SE = 0.14$ , $p < .001$ ;<br><b>AGE<sup>2</sup>:</b> $\beta = -0.07$ , $t(238) = -13.87$ , $SE = 0.01$ , $p < .001$ ;<br>$d = 0.06$  | <b>Intercept:</b> $\beta = -1.29$ , $t(51) = -2.40$ , $SE = 0.54$ , $p = .020$ ;<br><b>HOB:</b> $\beta = 0.03$ , $t(289) = 4.24$ , $SE = 0.01$ , $p < .001$ ;<br><b>STATUS:</b> $\beta = 0.18$ , $t(51) = 0.34$ , $SE = 0.52$ , $p = .737$ ;<br><b>AGE:</b> $\beta = 2.99$ , $t(289) = 28.41$ , $SE = 0.11$ , $p < .001$ ;<br><b>AGE*STATUS:</b> $\beta = 0.10$ , $t(289) = 2.55$ , $SE = 0.04$ , $p = .011$ ;<br><b>AGE<sup>2</sup>:</b> $\beta = -0.06$ , $t(289) = -19.15$ , $SE = 0.003$ , $p < .001$ ;<br>$d = 0.50$ | <b>Intercept:</b> $\beta = 7.90$ , $t(51) = 20.14$ , $SE = 0.39$ , $p < .001$ ;<br><b>HOB:</b> $\beta = 0.01$ , $t(289) = 1.14$ , $SE = 0.01$ , $p = .255$ ;<br><b>STATUS:</b> $\beta = -1.69$ , $t(51) = -3.38$ , $SE = 0.50$ , $p = .001$ ;<br><b>AGE:</b> $\beta = -0.26$ , $t(286) = -2.56$ , $SE = 0.10$ , $p = .011$ ;<br><b>AGE*STATUS:</b> $\beta = 0.29$ , $t(289) = 3.58$ , $SE = 0.08$ , $p < .001$ ;<br><b>AGE<sup>2</sup>:</b> $\beta = 0.03$ , $t(289) = 7.16$ , $SE = 0.004$ , $p < .001$ ;<br>$d = 0.13$   | <b>Intercept:</b> $\beta = 5.57$ , $t(289) = 8.23$ , $SE = 0.68$ , $p < .001$ ;<br><b>HOB:</b> $\beta = -0.01$ , $t(289) = -0.85$ , $SE = 0.01$ , $p = .397$ ;<br><b>STATUS:</b> $\beta = -0.37$ , $t(289) = -0.62$ , $SE = 0.60$ , $p = .539$ ;<br><b>AGE:</b> $\beta = 0.17$ , $t(51) = 1.16$ , $SE = 0.15$ , $p = .251$ ;<br><b>AGE*STATUS:</b> $\beta = 0.22$ , $t(51) = 2.59$ , $SE = 0.09$ , $p = .013$ ;<br><b>AGE<sup>2</sup>:</b> $\beta = 0.03$ , $t(289) = 4.64$ , $SE = 0.01$ , $p < .001$ ;<br>$d = 0.10$ | <b>Intercept:</b> $\beta = -1.17$ , $t(289) = -1.47$ , $SE = 0.80$ , $p = .144$ ;<br><b>HOB:</b> $\beta = 0.02$ , $t(289) = 2.32$ , $SE = 0.01$ , $p = .021$ ;<br><b>STATUS:</b> $\beta = -0.28$ , $t(289) = -0.40$ , $SE = 0.72$ , $p = .692$ ;<br><b>AGE:</b> $\beta = 3.85$ , $t(51) = 26.90$ , $SE = 0.14$ , $p < .001$ ;<br><b>AGE*STATUS:</b> $\beta = 0.29$ , $t(51) = 3.95$ , $SE = 0.07$ , $p < .001$ ;<br><b>AGE<sup>2</sup>:</b> $\beta = -0.07$ , $t(289) = -14.86$ , $SE = 0.004$ , $p < .001$ ;<br>$d = 0.27$ |
| Object in Mouth                                     | <b>Intercept:</b> $\beta = 1.28$ , $t(51) =$                                                                                                                                                                                                                                                                                                                                                                                        | <b>Intercept:</b> $\beta = -1.71$ , $t(51) =$                                                                                                                                                                                                                                                                                                                                                                                                                                                                             | <b>Intercept:</b> $\beta = 7.63$ , $t(289) =$                                                                                                                                                                                                                                                                                                                                                                                                                                                                              | <b>Intercept:</b> $\beta = 5.54$ , $t(51) =$                                                                                                                                                                                                                                                                                                                                                                                                                                                                           | <b>Intercept:</b> $\beta = -1.53$ , $t(289) =$                                                                                                                                                                                                                                                                                                                                                                                                                                                                              |

|                                |                                                                                                                                                                                                                                                                                                                                                                                                                                                                                                            |                                                                                                                                                                                                                                                                                                                                                                                                                                                                                                                                                                                                                          |                                                                                                                                                                                                                                                                                                                                                                                                                                                                                                                                                                                                                         |                                                                                                                                                                                                                                                                                                                                                                                                                                                                                                                                                                                                                       |                                                                                                                                                                                                                                                                                                                                                                                                                                                                                                                                                                                                                      |
|--------------------------------|------------------------------------------------------------------------------------------------------------------------------------------------------------------------------------------------------------------------------------------------------------------------------------------------------------------------------------------------------------------------------------------------------------------------------------------------------------------------------------------------------------|--------------------------------------------------------------------------------------------------------------------------------------------------------------------------------------------------------------------------------------------------------------------------------------------------------------------------------------------------------------------------------------------------------------------------------------------------------------------------------------------------------------------------------------------------------------------------------------------------------------------------|-------------------------------------------------------------------------------------------------------------------------------------------------------------------------------------------------------------------------------------------------------------------------------------------------------------------------------------------------------------------------------------------------------------------------------------------------------------------------------------------------------------------------------------------------------------------------------------------------------------------------|-----------------------------------------------------------------------------------------------------------------------------------------------------------------------------------------------------------------------------------------------------------------------------------------------------------------------------------------------------------------------------------------------------------------------------------------------------------------------------------------------------------------------------------------------------------------------------------------------------------------------|----------------------------------------------------------------------------------------------------------------------------------------------------------------------------------------------------------------------------------------------------------------------------------------------------------------------------------------------------------------------------------------------------------------------------------------------------------------------------------------------------------------------------------------------------------------------------------------------------------------------|
| (MO)                           | 1.89, <i>SE</i> = 0.68, <i>p</i> = .065;<br><b>MO</b> : $\beta$ = 0.003, <i>t</i> (238) = 0.22, <i>SE</i> = 0.01, <i>p</i> = .823;<br><b>STATUS</b> : $\beta$ = 1.95, <i>t</i> (51) = 2.96, <i>SE</i> = 0.66, <i>p</i> = .005;<br><b>AGE</b> : $\beta$ = 3.69, <i>t</i> (52) = 26.36, <i>SE</i> = 0.14, <i>p</i> < .001;<br><b>AGE</b> <sup>2</sup> : $\beta$ = -0.07, <i>t</i> (238) = -13.66, <i>SE</i> = 0.01, <i>p</i> < .001;<br><i>d</i> = 0.03                                                      | = -2.97, <i>SE</i> = 0.58, <i>p</i> = .004;<br><b>MO</b> : $\beta$ = 0.03, <i>t</i> (289) = 2.65, <i>SE</i> = 0.01, <i>p</i> = .008;<br><b>STATUS</b> : $\beta$ = 0.32, <i>t</i> (51) = 0.50, <i>SE</i> = 0.63, <i>p</i> = .620;<br><b>AGE</b> : $\beta$ = 3.18, <i>t</i> (289) = 34.74, <i>SE</i> = 0.09, <i>p</i> < .001;<br><b>AGE</b> * <b>STATUS</b> : $\beta$ = 0.10, <i>t</i> (289) = 2.50, <i>SE</i> = 0.04, <i>p</i> = .013;<br><b>AGE</b> <sup>2</sup> : $\beta$ = -0.07, <i>t</i> (289) = -20.30, <i>SE</i> = 0.003, <i>p</i> < .001;<br><i>d</i> = 0.31                                                      | = 21.41, <i>SE</i> = 0.36, <i>p</i> < .001;<br><b>MO</b> : $\beta$ = 0.02, <i>t</i> (289) = 2.65, <i>SE</i> = 0.01, <i>p</i> = .008;<br><b>STATUS</b> : $\beta$ = -1.56, <i>t</i> (289) = -3.14, <i>SE</i> = 0.50, <i>p</i> = .002;<br><b>AGE</b> : $\beta$ = -0.22, <i>t</i> (51) = -2.79, <i>SE</i> = 0.08, <i>p</i> = .007;<br><b>AGE</b> * <b>STATUS</b> : $\beta$ = 0.28, <i>t</i> (51) = 3.43, <i>SE</i> = 0.08, <i>p</i> = .001;<br><b>AGE</b> <sup>2</sup> : $\beta$ = 0.03, <i>t</i> (289) = 7.90, <i>SE</i> = 0.004, <i>p</i> < .001;<br><i>d</i> = 0.31                                                      | 8.44, <i>SE</i> = 0.66, <i>p</i> < .001;<br><b>MO</b> : $\beta$ = 0.003, <i>t</i> (289) = 0.44, <i>SE</i> = 0.01, <i>p</i> = .662;<br><b>STATUS</b> : $\beta$ = -0.39, <i>t</i> (51) = -0.65, <i>SE</i> = 0.60, <i>p</i> = .519;<br><b>AGE</b> : $\beta$ = 0.14, <i>t</i> (289) = 1.00, <i>SE</i> = 0.14, <i>p</i> = .317;<br><b>AGE</b> * <b>STATUS</b> : $\beta$ = 0.23, <i>t</i> (289) = 2.58, <i>SE</i> = 0.09, <i>p</i> = .010;<br><b>AGE</b> <sup>2</sup> : $\beta$ = 0.03, <i>t</i> (289) = 4.98, <i>SE</i> = 0.01, <i>p</i> < .001;<br><i>d</i> = 0.05                                                        | = -1.85, <i>SE</i> = 0.82, <i>p</i> = .065;<br><b>MO</b> : $\beta$ = 0.02, <i>t</i> (289) = 1.75, <i>SE</i> = 0.01, <i>p</i> = .081;<br><b>STATUS</b> : $\beta$ = -0.19, <i>t</i> (289) = -0.26, <i>SE</i> = 0.73, <i>p</i> = .798;<br><b>AGE</b> : $\beta$ = 3.98, <i>t</i> (51) = 28.66, <i>SE</i> = 0.14, <i>p</i> < .001;<br><b>AGE</b> * <b>STATUS</b> : $\beta$ = 0.29, <i>t</i> (51) = 4.00, <i>SE</i> = 0.07, <i>p</i> < .001;<br><b>AGE</b> <sup>2</sup> : $\beta$ = -0.06, <i>t</i> (289) = -16.09, <i>SE</i> = 0.004, <i>p</i> < .001;<br><i>d</i> = 0.21                                                 |
| Object Touching Body (OTB)     | <b>Intercept</b> : $\beta$ = 2.46, <i>t</i> (51) = 2.29, <i>SE</i> = 1.07, <i>p</i> = .026;<br><b>OTB</b> : $\beta$ = -0.01, <i>t</i> (238) = -1.17, <i>SE</i> = 0.01, <i>p</i> = .244;<br><b>STATUS</b> : $\beta$ = 1.99, <i>t</i> (51) = 3.06, <i>SE</i> = 0.65, <i>p</i> = .004;<br><b>AGE</b> : $\beta$ = 3.57, <i>t</i> (52) = 22.88, <i>SE</i> = 0.16, <i>p</i> < .001;<br><b>AGE</b> <sup>2</sup> : $\beta$ = -0.06, <i>t</i> (238) = -12.86, <i>SE</i> = 0.01, <i>p</i> < .001;<br><i>d</i> = 0.15 | <b>Intercept</b> : $\beta$ = -0.13, <i>t</i> (51) = -0.12, <i>SE</i> = 1.06, <i>p</i> = .905;<br><b>OTB</b> : $\beta$ = -0.01, <i>t</i> (289) = -1.60, <i>SE</i> = 0.01, <i>p</i> = .111;<br><b>STATUS</b> : $\beta$ = 0.42, <i>t</i> (51) = 0.75, <i>SE</i> = 0.56, <i>p</i> = .457;<br><b>AGE</b> : $\beta$ = 3.07, <i>t</i> (289) = 23.20, <i>SE</i> = 0.13, <i>p</i> < .001;<br><b>AGE</b> * <b>STATUS</b> : $\beta$ = 0.09, <i>t</i> (289) = 2.28, <i>SE</i> = 0.04, <i>p</i> = .024;<br><b>AGE</b> <sup>2</sup> : $\beta$ = -0.07, <i>t</i> (289) = -16.33, <i>SE</i> = 0.004, <i>p</i> < .001;<br><i>d</i> = 0.19 | <b>Intercept</b> : $\beta$ = 9.39, <i>t</i> (289) = 11.63, <i>SE</i> = 0.81, <i>p</i> < .001;<br><b>OTB</b> : $\beta$ = -0.02, <i>t</i> (289) = -2.20, <i>SE</i> = 0.01, <i>p</i> = .028;<br><b>STATUS</b> : $\beta$ = -1.47, <i>t</i> (289) = -2.93, <i>SE</i> = 0.50, <i>p</i> = .004;<br><b>AGE</b> : $\beta$ = -0.37, <i>t</i> (51) = -3.45, <i>SE</i> = 0.11, <i>p</i> = .001;<br><b>AGE</b> * <b>STATUS</b> : $\beta$ = 0.27, <i>t</i> (51) = 3.33, <i>SE</i> = 0.08, <i>p</i> = .002;<br><b>AGE</b> <sup>2</sup> : $\beta$ = 0.03, <i>t</i> (289) = 8.14, <i>SE</i> = 0.004, <i>p</i> < .001;<br><i>d</i> = 0.26 | <b>Intercept</b> : $\beta$ = 8.24, <i>t</i> (289) = 7.92, <i>SE</i> = 1.04, <i>p</i> < .001;<br><b>OTB</b> : $\beta$ = -0.03, <i>t</i> (289) = -3.26, <i>SE</i> = 0.01, <i>p</i> = .001;<br><b>STATUS</b> : $\beta$ = -0.27, <i>t</i> (289) = -0.48, <i>SE</i> = 0.57, <i>p</i> = .630;<br><b>AGE</b> : $\beta$ = -0.14, <i>t</i> (51) = -0.92, <i>SE</i> = 0.15, <i>p</i> = .362;<br><b>AGE</b> * <b>STATUS</b> : $\beta$ = 0.22, <i>t</i> (51) = 2.60, <i>SE</i> = 0.08, <i>p</i> = .012;<br><b>AGE</b> <sup>2</sup> : $\beta$ = 0.04, <i>t</i> (289) = 6.84, <i>SE</i> = 0.01, <i>p</i> < .001;<br><i>d</i> = 0.38 | <b>Intercept</b> : $\beta$ = 2.29, <i>t</i> (289) = 1.60, <i>SE</i> = 1.43, <i>p</i> = .111;<br><b>OTB</b> : $\beta$ = -0.04, <i>t</i> (289) = -2.92, <i>SE</i> = 0.01, <i>p</i> = .004;<br><b>STATUS</b> : $\beta$ = 0.01, <i>t</i> (289) = 0.02, <i>SE</i> = 0.75, <i>p</i> = .986;<br><b>AGE</b> : $\beta$ = 3.63, <i>t</i> (51) = 19.38, <i>SE</i> = 0.19, <i>p</i> < .001;<br><b>AGE</b> * <b>STATUS</b> : $\beta$ = 0.28, <i>t</i> (51) = 3.85, <i>SE</i> = 0.07, <i>p</i> < .001;<br><b>AGE</b> <sup>2</sup> : $\beta$ = -0.06, <i>t</i> (289) = -9.69, <i>SE</i> = 0.01, <i>p</i> < .001;<br><i>d</i> = 0.34 |
| Looking at Object in Hand (LK) | <b>Intercept</b> : $\beta$ = 1.22, <i>t</i> (51) = 1.73, <i>SE</i> = 0.71, <i>p</i> = .091;<br><b>LK</b> : $\beta$ = -0.01, <i>t</i> (238) = -0.79, <i>SE</i> = 0.01, <i>p</i> = .428;<br><b>STATUS</b> : $\beta$ = 1.94, <i>t</i> (51) = 2.92, <i>SE</i> = 0.66, <i>p</i> = .005;<br><b>AGE</b> : $\beta$ = 3.76, <i>t</i> (52) = 25.85, <i>SE</i> = 0.15, <i>p</i> < .001;<br><b>AGE</b> <sup>2</sup> : $\beta$ = -0.07, <i>t</i> (238) = -14.37, <i>SE</i> = 0.01, <i>p</i> < .001;<br><i>d</i> = 0.10  | <b>Intercept</b> : $\beta$ = -1.25, <i>t</i> (51) = -2.15, <i>SE</i> = 0.58, <i>p</i> = .036;<br><b>LK</b> : $\beta$ = 0.02, <i>t</i> (289) = 2.10, <i>SE</i> = 0.01, <i>p</i> = .037;<br><b>STATUS</b> : $\beta$ = 0.40, <i>t</i> (51) = 0.74, <i>SE</i> = 0.54, <i>p</i> = .465;<br><b>AGE</b> : $\beta$ = 3.08, <i>t</i> (289) = 27.35, <i>SE</i> = 0.11, <i>p</i> < .001;<br><b>AGE</b> * <b>STATUS</b> : $\beta$ = 0.09, <i>t</i> (289) = 2.23, <i>SE</i> = 0.04, <i>p</i>                                                                                                                                          | <b>Intercept</b> : $\beta$ = 8.01, <i>t</i> (51) = 19.98, <i>SE</i> = 0.40, <i>p</i> < .001;<br><b>LK</b> : $\beta$ = 0.02, <i>t</i> (289) = 2.03, <i>SE</i> = 0.01, <i>p</i> = .043;<br><b>STATUS</b> : $\beta$ = -1.62, <i>t</i> (51) = -3.27, <i>SE</i> = 0.49, <i>p</i> = .002;<br><b>AGE</b> : $\beta$ = -0.32, <i>t</i> (289) = -3.38, <i>SE</i> = 0.10, <i>p</i> < .001;<br><b>AGE</b> * <b>STATUS</b> : $\beta$ = 0.28, <i>t</i> (289) = 3.54, <i>SE</i> = 0.08, <i>p</i>                                                                                                                                       | <b>Intercept</b> : $\beta$ = 5.52, <i>t</i> (289) = 8.19, <i>SE</i> = 0.67, <i>p</i> < .001;<br><b>LK</b> : $\beta$ = -0.01, <i>t</i> (289) = -1.23, <i>SE</i> = 0.01, <i>p</i> = .219;<br><b>STATUS</b> : $\beta$ = -0.42, <i>t</i> (289) = -0.70, <i>SE</i> = 0.60, <i>p</i> = .483;<br><b>AGE</b> : $\beta$ = 0.20, <i>t</i> (51) = 1.35, <i>SE</i> = 0.15, <i>p</i> = .182;<br><b>AGE</b> * <b>STATUS</b> : $\beta$ = 0.23, <i>t</i> (51) = 2.62, <i>SE</i> = 0.09, <i>p</i>                                                                                                                                      | <b>Intercept</b> : $\beta$ = -1.04, <i>t</i> (289) = -1.31, <i>SE</i> = 0.80, <i>p</i> = .193;<br><b>LK</b> : $\beta$ = 0.03, <i>t</i> (289) = 2.12, <i>SE</i> = 0.01, <i>p</i> = .035;<br><b>STATUS</b> : $\beta$ = -0.10, <i>t</i> (289) = -0.14, <i>SE</i> = 0.72, <i>p</i> = .892;<br><b>AGE</b> : $\beta$ = 3.82, <i>t</i> (51) = 24.14, <i>SE</i> = 0.16, <i>p</i> < .001;<br><b>AGE</b> * <b>STATUS</b> : $\beta$ = 0.28,                                                                                                                                                                                     |

|                          |                                                                                                                                                                                                                                                                                                                                                                                             |                                                                                                                                                                                                                                                                                                                                                                                                                                                                           |                                                                                                                                                                                                                                                                                                                                                                                                                                                                            |                                                                                                                                                                                                                                                                                                                                                                                                                                                                        |                                                                                                                                                                                                                                                                                                                                                                                                                                                                             |
|--------------------------|---------------------------------------------------------------------------------------------------------------------------------------------------------------------------------------------------------------------------------------------------------------------------------------------------------------------------------------------------------------------------------------------|---------------------------------------------------------------------------------------------------------------------------------------------------------------------------------------------------------------------------------------------------------------------------------------------------------------------------------------------------------------------------------------------------------------------------------------------------------------------------|----------------------------------------------------------------------------------------------------------------------------------------------------------------------------------------------------------------------------------------------------------------------------------------------------------------------------------------------------------------------------------------------------------------------------------------------------------------------------|------------------------------------------------------------------------------------------------------------------------------------------------------------------------------------------------------------------------------------------------------------------------------------------------------------------------------------------------------------------------------------------------------------------------------------------------------------------------|-----------------------------------------------------------------------------------------------------------------------------------------------------------------------------------------------------------------------------------------------------------------------------------------------------------------------------------------------------------------------------------------------------------------------------------------------------------------------------|
|                          |                                                                                                                                                                                                                                                                                                                                                                                             | = .027;<br><b>AGE</b> <sup>2</sup> : $\beta = -0.07, t(289) = -18.62, SE = 0.004, p < .001$ ;<br>$d = 0.25$                                                                                                                                                                                                                                                                                                                                                               | < .001;<br><b>AGE</b> <sup>2</sup> : $\beta = 0.03, t(289) = 8.51, SE = 0.004, p < .001$ ;<br>$d = 0.24$                                                                                                                                                                                                                                                                                                                                                                   | .011;<br><b>AGE</b> <sup>2</sup> : $\beta = 0.03, t(289) = 4.72, SE = 0.01, p < .001$ ;<br>$d = 0.14$                                                                                                                                                                                                                                                                                                                                                                  | $t(51) = 3.75, SE = 0.07, p < .001$ ;<br><b>AGE</b> <sup>2</sup> : $\beta = -0.07, t(289) = -13.14, SE = 0.01, p < .001$ ;<br>$d = 0.25$                                                                                                                                                                                                                                                                                                                                    |
| Fingering Object (FN)    | <b>Intercept</b> : $\beta = 1.27, t(51) = 1.78, SE = 0.71, p = .081$ ;<br><b>FN</b> : $\beta = 0.04, t(238) = 0.73, SE = 0.05, p = .468$ ;<br><b>STATUS</b> : $\beta = 1.94, t(51) = 2.96, SE = 0.65, p = .005$ ;<br><b>AGE</b> : $\beta = 3.68, t(52) = 26.53, SE = 0.14, p < .001$ ;<br><b>AGE</b> <sup>2</sup> : $\beta = -0.07, t(238) = -13.98, SE = 0.01, p < .001$ ;<br>$d = 0.09$   | <b>Intercept</b> : $\beta = -1.50, t(51) = -2.68, SE = 0.56, p = .010$ ;<br><b>FN</b> : $\beta = 0.08, t(289) = 1.39, SE = 0.06, p = .167$ ;<br><b>STATUS</b> : $\beta = 0.31, t(51) = 0.56, SE = 0.55, p = .575$ ;<br><b>AGE</b> : $\beta = 3.19, t(289) = 35.09, SE = 0.09, p < .001$ ;<br><b>AGE*STATUS</b> : $\beta = 0.10, t(289) = 2.48, SE = 0.04, p = .014$ ;<br><b>AGE</b> <sup>2</sup> : $\beta = -0.07, t(289) = -22.66, SE = 0.003, p < .001$ ;<br>$d = 0.16$ | <b>Intercept</b> : $\beta = 7.91, t(51) = 20.36, SE = 0.39, p < .001$ ;<br><b>FN</b> : $\beta = -0.04, t(289) = -1.30, SE = 0.03, p = .193$ ;<br><b>STATUS</b> : $\beta = -1.63, t(51) = -3.29, SE = 0.49, p = .002$ ;<br><b>AGE</b> : $\beta = -0.20, t(289) = -2.49, SE = 0.08, p = .013$ ;<br><b>AGE*STATUS</b> : $\beta = 0.29, t(289) = 3.55, SE = 0.08, p < .001$ ;<br><b>AGE</b> <sup>2</sup> : $\beta = 0.03, t(289) = 7.55, SE = 0.004, p < .001$ ;<br>$d = 0.15$ | <b>Intercept</b> : $\beta = 5.63, t(289) = 8.37, SE = 0.67, p < .001$ ;<br><b>FN</b> : $\beta = -0.03, t(289) = -0.73, SE = 0.04, p = .467$ ;<br><b>STATUS</b> : $\beta = -0.39, t(289) = -0.66, SE = 0.59, p = .513$ ;<br><b>AGE</b> : $\beta = 0.14, t(51) = 1.07, SE = 0.14, p = .290$ ;<br><b>AGE*STATUS</b> : $\beta = 0.22, t(51) = 2.60, SE = 0.09, p = .012$ ;<br><b>AGE</b> <sup>2</sup> : $\beta = 0.03, t(289) = 5.11, SE = 0.01, p < .001$ ;<br>$d = 0.09$ | <b>Intercept</b> : $\beta = -1.28, t(289) = -1.57, SE = 0.81, p = .117$ ;<br><b>FN</b> : $\beta = 0.003, t(289) = 0.04, SE = 0.07, p = .968$ ;<br><b>STATUS</b> : $\beta = 0.29, t(51) = 3.91, SE = 0.07, p < .001$ ;<br><b>AGE</b> : $\beta = 4.00, t(51) = 28.81, SE = 0.14, p < .001$ ;<br><b>AGE*STATUS</b> : $\beta = 0.29, t(51) = 3.91, SE = 0.07, p < .001$ ;<br><b>AGE</b> <sup>2</sup> : $\beta = -0.07, t(289) = -16.08, SE = 0.004, p < .001$ ;<br>$d = 0.01$   |
| Banging Object (BN)      | <b>Intercept</b> : $\beta = 1.29, t(51) = 1.80, SE = 0.71, p = .077$ ;<br><b>BN</b> : $\beta = -0.03, t(238) = -0.53, SE = 0.05, p = .599$ ;<br><b>STATUS</b> : $\beta = 2.00, t(51) = 3.00, SE = 0.67, p = .004$ ;<br><b>AGE</b> : $\beta = 3.70, t(52) = 27.08, SE = 0.14, p < .001$ ;<br><b>AGE</b> <sup>2</sup> : $\beta = -0.07, t(238) = -14.49, SE = 0.01, p < .001$ ;<br>$d = 0.07$ | <b>Intercept</b> : $\beta = -1.30, t(51) = -2.27, SE = 0.57, p = .028$ ;<br><b>BN</b> : $\beta = 0.13, t(289) = 3.84, SE = 0.03, p < .001$ ;<br><b>STATUS</b> : $\beta = 0.04, t(51) = 0.06, SE = 0.58, p = .951$ ;<br><b>AGE</b> : $\beta = 3.16, t(289) = 35.89, SE = 0.09, p < .001$ ;<br><b>AGE*STATUS</b> : $\beta = 0.11, t(289) = 2.64, SE = 0.04, p = .009$ ;<br><b>AGE</b> <sup>2</sup> : $\beta = -0.07, t(289) = -23.29, SE = 0.003, p < .001$ ;<br>$d = 0.45$ | <b>Intercept</b> : $\beta = 7.89, t(51) = 20.53, SE = 0.38, p < .001$ ;<br><b>BN</b> : $\beta = 0.02, t(289) = 0.86, SE = 0.02, p = .391$ ;<br><b>STATUS</b> : $\beta = -1.70, t(51) = -3.32, SE = 0.51, p = .002$ ;<br><b>AGE</b> : $\beta = -0.22, t(289) = -2.72, SE = 0.08, p = .007$ ;<br><b>AGE*STATUS</b> : $\beta = 0.29, t(289) = 3.56, SE = 0.08, p < .001$ ;<br><b>AGE</b> <sup>2</sup> : $\beta = 0.03, t(289) = 7.70, SE = 0.004, p < .001$ ;<br>$d = 0.10$   | <b>Intercept</b> : $\beta = 5.61, t(289) = 8.34, SE = 0.67, p < .001$ ;<br><b>BN</b> : $\beta = 0.02, t(289) = 0.87, SE = 0.02, p = .386$ ;<br><b>STATUS</b> : $\beta = -0.44, t(289) = -0.74, SE = 0.60, p = .461$ ;<br><b>AGE</b> : $\beta = 0.13, t(51) = 0.94, SE = 0.14, p = .352$ ;<br><b>AGE*STATUS</b> : $\beta = 0.23, t(51) = 2.62, SE = 0.09, p = .012$ ;<br><b>AGE</b> <sup>2</sup> : $\beta = 0.03, t(289) = 5.13, SE = 0.01, p < .001$ ;<br>$d = 0.10$   | <b>Intercept</b> : $\beta = -1.13, t(289) = -1.43, SE = 0.79, p = .154$ ;<br><b>BN</b> : $\beta = 0.15, t(289) = 2.96, SE = 0.05, p = .003$ ;<br><b>STATUS</b> : $\beta = -0.55, t(289) = -0.77, SE = 0.71, p = .441$ ;<br><b>AGE</b> : $\beta = 3.94, t(51) = 28.66, SE = 0.14, p < .001$ ;<br><b>AGE*STATUS</b> : $\beta = 0.31, t(51) = 4.17, SE = 0.07, p < .001$ ;<br><b>AGE</b> <sup>2</sup> : $\beta = -0.07, t(289) = -15.91, SE = 0.004, p < .001$ ;<br>$d = 0.35$ |
| Object Manipulation (MN) | <b>Intercept</b> : $\beta = 1.31, t(51) = 1.86, SE = 0.70, p = .069$ ;<br><b>MN</b> : $\beta = 0.06, t(238) = 1.19, SE = 0.05, p = .237$ ;                                                                                                                                                                                                                                                  | <b>Intercept</b> : $\beta = -1.44, t(51) = -2.57, SE = 0.56, p = .013$ ;<br><b>MN</b> : $\beta = 0.10, t(289) =$                                                                                                                                                                                                                                                                                                                                                          | <b>Intercept</b> : $\beta = 7.88, t(51) = 20.19, SE = 0.39, p < .001$ ;<br><b>MN</b> : $\beta = -0.05, t(289) = -0.58, SE = 0.09, p = .563$ ;                                                                                                                                                                                                                                                                                                                              | <b>Intercept</b> : $\beta = 5.61, t(289) = 8.25, SE = 0.68, p < .001$ ;<br><b>MN</b> : $\beta = -0.04, t(289) = -0.49, SE = 0.08, p = .626$ ;                                                                                                                                                                                                                                                                                                                          | <b>Intercept</b> : $\beta = -1.26, t(289) = -1.58, SE = 0.79, p = .115$ ;<br><b>MN</b> : $\beta = -0.08, t(289) = -$                                                                                                                                                                                                                                                                                                                                                        |

|                           |                                                                                                                                                                                                                                                                                                                                                                                                                                                                     |                                                                                                                                                                                                                                                                                                                                                                                                                                                                                                                                                              |                                                                                                                                                                                                                                                                                                                                                                                                                                                                                                                                                                |                                                                                                                                                                                                                                                                                                                                                                                                                                                                                                                                                        |                                                                                                                                                                                                                                                                                                                                                                                                                                                                                                                                                                  |
|---------------------------|---------------------------------------------------------------------------------------------------------------------------------------------------------------------------------------------------------------------------------------------------------------------------------------------------------------------------------------------------------------------------------------------------------------------------------------------------------------------|--------------------------------------------------------------------------------------------------------------------------------------------------------------------------------------------------------------------------------------------------------------------------------------------------------------------------------------------------------------------------------------------------------------------------------------------------------------------------------------------------------------------------------------------------------------|----------------------------------------------------------------------------------------------------------------------------------------------------------------------------------------------------------------------------------------------------------------------------------------------------------------------------------------------------------------------------------------------------------------------------------------------------------------------------------------------------------------------------------------------------------------|--------------------------------------------------------------------------------------------------------------------------------------------------------------------------------------------------------------------------------------------------------------------------------------------------------------------------------------------------------------------------------------------------------------------------------------------------------------------------------------------------------------------------------------------------------|------------------------------------------------------------------------------------------------------------------------------------------------------------------------------------------------------------------------------------------------------------------------------------------------------------------------------------------------------------------------------------------------------------------------------------------------------------------------------------------------------------------------------------------------------------------|
|                           | <p><b>STATUS:</b> <math>\beta = 1.97, t(51) = 3.03, SE = 0.65, p = .004</math>;<br/> <b>AGE:</b> <math>\beta = 3.68, t(52) = 26.81, SE = 0.14, p &lt; .001</math>;<br/> <b>AGE<sup>2</sup>:</b> <math>\beta = -0.07, t(238) = -14.14, SE = 0.01, p &lt; .001</math>;<br/> <i>d</i> = 0.15</p>                                                                                                                                                                       | <p><math>2.01, SE = 0.05, p = .046</math>;<br/> <b>STATUS:</b> <math>\beta = 0.43, t(51) = 0.77, SE = 0.56, p = .446</math>;<br/> <b>AGE:</b> <math>\beta = 3.19, t(289) = 36.6, SE = 0.09, p &lt; .001</math>;<br/> <b>AGE*STATUS:</b> <math>\beta = 0.08, t(289) = 2.20, SE = 0.04, p = .029</math>;<br/> <b>AGE<sup>2</sup>:</b> <math>\beta = -0.07, t(289) = -24.30, SE = 0.003, p &lt; .001</math>;<br/> <i>d</i> = 0.24</p>                                                                                                                           | <p><b>STATUS:</b> <math>\beta = -1.69, t(51) = -3.31, SE = 0.51, p = .002</math>;<br/> <b>AGE:</b> <math>\beta = -0.21, t(289) = -2.47, SE = 0.08, p = .014</math>;<br/> <b>AGE*STATUS:</b> <math>\beta = 0.29, t(289) = 3.58, SE = 0.08, p &lt; .001</math>;<br/> <b>AGE<sup>2</sup>:</b> <math>\beta = 0.03, t(289) = 7.63, SE = 0.004, p &lt; .001</math>;<br/> <i>d</i> = 0.07</p>                                                                                                                                                                         | <p><b>STATUS:</b> <math>\beta = -0.43, t(289) = -0.71, SE = 0.60, p = .476</math>;<br/> <b>AGE:</b> <math>\beta = 0.14, t(51) = 1.08, SE = 0.13, p = .288</math>;<br/> <b>AGE*STATUS:</b> <math>\beta = 0.23, t(51) = 2.66, SE = 0.09, p = .011</math>;<br/> <b>AGE<sup>2</sup>:</b> <math>\beta = 0.03, t(289) = 5.13, SE = 0.01, p &lt; .001</math>;<br/> <i>d</i> = 0.06</p>                                                                                                                                                                        | <p><math>0.97, SE = 0.08, p = .333</math>;<br/> <b>STATUS:</b> <math>\beta = -0.23, t(289) = -0.32, SE = 0.71, p = .748</math>;<br/> <b>AGE:</b> <math>\beta = 4.01, t(51) = 28.99, SE = 0.13, p &lt; .001</math>;<br/> <b>AGE*STATUS:</b> <math>\beta = 0.30, t(51) = 3.99, SE = 0.07, p &lt; .001</math>;<br/> <b>AGE<sup>2</sup>:</b> <math>\beta = -0.07, t(289) = -16.18, SE = 0.004, p &lt; .001</math>;<br/> <i>d</i> = 0.11</p>                                                                                                                          |
| Transferring Object (TO)  | <p><b>Intercept:</b> <math>\beta = 1.22, t(51) = 1.67, SE = 0.74, p = .102</math>;<br/> <b>TO:</b> <math>\beta = -0.06, t(238) = -0.47, SE = 0.14, p = .641</math>;<br/> <b>STATUS:</b> <math>\beta = 1.93, t(51) = 2.93, SE = 0.66, p = .005</math>;<br/> <b>AGE:</b> <math>\beta = 3.73, t(52) = 24.30, SE = 0.15, p &lt; .001</math>;<br/> <b>AGE<sup>2</sup>:</b> <math>\beta = -0.07, t(238) = -13.58, SE = 0.05, p &lt; .001</math>;<br/> <i>d</i> = 0.06</p> | <p><b>Intercept:</b> <math>\beta = -1.10, t(51) = -1.90, SE = 0.58, p = .063</math>;<br/> <b>TO:</b> <math>\beta = 0.24, t(289) = 2.41, SE = 0.10, p = .017</math>;<br/> <b>STATUS:</b> <math>\beta = 0.40, t(51) = 0.65, SE = 0.62, p = .520</math>;<br/> <b>AGE:</b> <math>\beta = 3.07, t(289) = 28.42, SE = 0.11, p &lt; .001</math>;<br/> <b>AGE*STATUS:</b> <math>\beta = 0.10, t(289) = 2.41, SE = 0.04, p = .017</math>;<br/> <b>AGE<sup>2</sup>:</b> <math>\beta = -0.07, t(289) = -17.39, SE = 0.004, p &lt; .001</math>;<br/> <i>d</i> = 0.28</p> | <p><b>Intercept:</b> <math>\beta = 8.06, t(289) = 19.83, SE = 0.41, p &lt; .001</math>;<br/> <b>TO:</b> <math>\beta = 0.16, t(289) = 1.92, SE = 0.09, p = .056</math>;<br/> <b>STATUS:</b> <math>\beta = -1.53, t(289) = -3.15, SE = 0.49, p = .002</math>;<br/> <b>AGE:</b> <math>\beta = -0.30, t(51) = -3.13, SE = 0.10, p = .003</math>;<br/> <b>AGE*STATUS:</b> <math>\beta = 0.28, t(51) = 3.49, SE = 0.08, p &lt; .001</math>;<br/> <b>AGE<sup>2</sup>:</b> <math>\beta = 0.03, t(289) = 8.06, SE = 0.004, p &lt; .001</math>;<br/> <i>d</i> = 0.23</p> | <p><b>Intercept:</b> <math>\beta = 5.76, t(237) = 8.79, SE = 0.66, p &lt; .001</math>;<br/> <b>TO:</b> <math>\beta = 0.14, t(52) = 1.25, SE = 0.11, p = .217</math>;<br/> <b>STATUS:</b> <math>\beta = -0.46, t(237) = -0.80, SE = 0.57, p = .423</math>;<br/> <b>AGE:</b> <math>\beta = 0.07, t(51) = 0.53, SE = 0.13, p = .597</math>;<br/> <b>AGE*STATUS:</b> <math>\beta = 0.22, t(51) = 2.75, SE = 0.08, p = .008</math>;<br/> <b>AGE<sup>2</sup>:</b> <math>\beta = 0.03, t(237) = 5.93, SE = 0.01, p &lt; .001</math>;<br/> <i>d</i> = 0.35</p> | <p><b>Intercept:</b> <math>\beta = -0.74, t(289) = -0.90, SE = 0.82, p = .369</math>;<br/> <b>TO:</b> <math>\beta = 0.40, t(289) = 2.87, SE = 0.14, p = .004</math>;<br/> <b>STATUS:</b> <math>\beta = -0.10, t(289) = -0.15, SE = 0.71, p = .884</math>;<br/> <b>AGE:</b> <math>\beta = 3.78, t(51) = 23.31, SE = 0.16, p &lt; .001</math>;<br/> <b>AGE*STATUS:</b> <math>\beta = 0.29, t(51) = 4.02, SE = 0.07, p &lt; .001</math>;<br/> <b>AGE<sup>2</sup>:</b> <math>\beta = -0.06, t(289) = -12.68, SE = 0.01, p &lt; .001</math>;<br/> <i>d</i> = 0.34</p> |
| Bouts of Exploration (BE) | <p><b>Intercept:</b> <math>\beta = 1.42, t(51) = 1.94, SE = 0.73, p = .058</math>;<br/> <b>BE:</b> <math>\beta = -0.01, t(238) = -0.87, SE = 0.01, p = .388</math>;<br/> <b>STATUS:</b> <math>\beta = 1.99, t(51) = 3.01, SE = 0.66, p = .004</math>;<br/> <b>AGE:</b> <math>\beta = 3.72, t(52) = 27.07, SE = 0.14, p &lt; .001</math>;<br/> <b>AGE<sup>2</sup>:</b> <math>\beta = -0.07, t(238) = -14.37, SE = 0.01, p &lt; .001</math>;<br/> <i>d</i> = 0.11</p> | <p><b>Intercept:</b> <math>\beta = -1.98, t(51) = -3.86, SE = 0.51, p &lt; .001</math>;<br/> <b>BE:</b> <math>\beta = 0.06, t(289) = 4.70, SE = 0.01, p &lt; .001</math>;<br/> <b>STATUS:</b> <math>\beta = 0.05, t(51) = 0.09, SE = 0.55, p = .927</math>;<br/> <b>AGE:</b> <math>\beta = 3.04, t(289) = 30.15, SE = 0.10, p &lt; .001</math>;<br/> <b>AGE*STATUS:</b> <math>\beta = 0.11, t(289) = 2.81, SE = 0.04, p = .005</math>;<br/> <b>AGE<sup>2</sup>:</b> <math>\beta = -0.06, t(289) = -20.01, SE = 0.003, p &lt; .001</math></p>                 | <p><b>Intercept:</b> <math>\beta = 7.74, t(289) = 21.40, SE = 0.36, p &lt; .001</math>;<br/> <b>BE:</b> <math>\beta = 0.01, t(289) = 0.87, SE = 0.01, p = .384</math>;<br/> <b>STATUS:</b> <math>\beta = -1.59, t(289) = -3.26, SE = 0.49, p = .001</math>;<br/> <b>AGE:</b> <math>\beta = -0.23, t(51) = -2.57, SE = 0.09, p = .013</math>;<br/> <b>AGE*STATUS:</b> <math>\beta = 0.28, t(51) = 3.46, SE = 0.08, p = .001</math>;<br/> <b>AGE<sup>2</sup>:</b> <math>\beta = 0.02, t(289) =</math></p>                                                        | <p><b>Intercept:</b> <math>\beta = 5.69, t(289) = 8.47, SE = 0.67, p &lt; .001</math>;<br/> <b>BE:</b> <math>\beta = -0.01, t(289) = -0.98, SE = 0.01, p = .329</math>;<br/> <b>STATUS:</b> <math>\beta = -0.35, t(289) = -0.59, SE = 0.60, p = .559</math>;<br/> <b>AGE:</b> <math>\beta = 0.16, t(51) = 1.17, SE = 0.14, p = .246</math>;<br/> <b>AGE*STATUS:</b> <math>\beta = 0.22, t(51) = 2.56, SE = 0.09, p = .013</math>;<br/> <b>AGE<sup>2</sup>:</b> <math>\beta = 0.03, t(289) = 4.86, SE = 0.01, p &lt; .001</math>;</p>                   | <p><b>Intercept:</b> <math>\beta = -1.83, t(289) = -2.21, SE = 0.83, p = .028</math>;<br/> <b>BE:</b> <math>\beta = 0.06, t(289) = 3.65, SE = 0.02, p &lt; .001</math>;<br/> <b>STATUS:</b> <math>\beta = -0.47, t(289) = -0.65, SE = 0.72, p = .517</math>;<br/> <b>AGE:</b> <math>\beta = 3.83, t(51) = 26.84, SE = 0.14, p &lt; .001</math>;<br/> <b>AGE*STATUS:</b> <math>\beta = 0.30, t(51) = 4.11, SE = 0.07, p &lt; .001</math>;<br/> <b>AGE<sup>2</sup>:</b> <math>\beta = -0.06, t(289) = -</math></p>                                                 |

|                                          |                                                                                                                                                                                                                                                                                                                                                                                                                                                                                  |                                                                                                                                                                                                                                                                                                                                                                                                                                                                                                                                                                               |                                                                                                                                                                                                                                                                                                                                                                                                                                                                                                                                                                              |                                                                                                                                                                                                                                                                                                                                                                                                                                                                                                                                                                          |                                                                                                                                                                                                                                                                                                                                                                                                                                                                                                                                                                                |
|------------------------------------------|----------------------------------------------------------------------------------------------------------------------------------------------------------------------------------------------------------------------------------------------------------------------------------------------------------------------------------------------------------------------------------------------------------------------------------------------------------------------------------|-------------------------------------------------------------------------------------------------------------------------------------------------------------------------------------------------------------------------------------------------------------------------------------------------------------------------------------------------------------------------------------------------------------------------------------------------------------------------------------------------------------------------------------------------------------------------------|------------------------------------------------------------------------------------------------------------------------------------------------------------------------------------------------------------------------------------------------------------------------------------------------------------------------------------------------------------------------------------------------------------------------------------------------------------------------------------------------------------------------------------------------------------------------------|--------------------------------------------------------------------------------------------------------------------------------------------------------------------------------------------------------------------------------------------------------------------------------------------------------------------------------------------------------------------------------------------------------------------------------------------------------------------------------------------------------------------------------------------------------------------------|--------------------------------------------------------------------------------------------------------------------------------------------------------------------------------------------------------------------------------------------------------------------------------------------------------------------------------------------------------------------------------------------------------------------------------------------------------------------------------------------------------------------------------------------------------------------------------|
|                                          |                                                                                                                                                                                                                                                                                                                                                                                                                                                                                  | .001;<br><i>d</i> = 0.55                                                                                                                                                                                                                                                                                                                                                                                                                                                                                                                                                      | 7.37, <i>SE</i> = 0.004, <i>p</i> < .001;<br><i>d</i> = 0.10                                                                                                                                                                                                                                                                                                                                                                                                                                                                                                                 | <i>d</i> = 0.12                                                                                                                                                                                                                                                                                                                                                                                                                                                                                                                                                          | 14.56, <i>SE</i> = 0.004, <i>p</i> < .001;<br><i>d</i> = 0.43                                                                                                                                                                                                                                                                                                                                                                                                                                                                                                                  |
| Variability of Individual Behaviors (IB) | <b>Intercept:</b> $\beta = 1.20$ , $t(51) = 1.42$ , <i>SE</i> = 0.85, <i>p</i> = .162;<br><b>IB:</b> $\beta = 0.01$ , $t(238) = 0.27$ , <i>SE</i> = 0.02, <i>p</i> = .784;<br><b>STATUS:</b> $\beta = 1.93$ , $t(51) = 2.97$ , <i>SE</i> = 0.65, <i>p</i> = .005;<br><b>AGE:</b> $\beta = 3.67$ , $t(52) = 25.67$ , <i>SE</i> = 0.14, <i>p</i> < .001;<br><b>AGE<sup>2</sup>:</b> $\beta = -0.07$ , $t(238) = -13.91$ , <i>SE</i> = 0.01, <i>p</i> < .001;<br><i>d</i> = 0.04    | <b>Intercept:</b> $\beta = -2.80$ , $t(51) = -5.07$ , <i>SE</i> = 0.55, <i>p</i> < .001;<br><b>IB:</b> $\beta = 0.06$ , $t(289) = 5.69$ , <i>SE</i> = 0.01, <i>p</i> < .001;<br><b>STATUS:</b> $\beta = 0.04$ , $t(51) = 0.07$ , <i>SE</i> = 0.52, <i>p</i> = .946;<br><b>AGE:</b> $\beta = 2.91$ , $t(289) = 27.81$ , <i>SE</i> = 0.10, <i>p</i> < .001;<br><b>AGE*STATUS:</b> $\beta = 0.11$ , $t(289) = 2.75$ , <i>SE</i> = 0.04, <i>p</i> = .006;<br><b>AGE<sup>2</sup>:</b> $\beta = -0.06$ , $t(289) = -19.27$ , <i>SE</i> = 0.003, <i>p</i> < .001;<br><i>d</i> = 0.67 | <b>Intercept:</b> $\beta = 7.60$ , $t(289) = 19.76$ , <i>SE</i> = 0.38, <i>p</i> < .001;<br><b>IB:</b> $\beta = 0.01$ , $t(289) = 1.23$ , <i>SE</i> = 0.01, <i>p</i> = .221;<br><b>STATUS:</b> $\beta = -1.59$ , $t(289) = -3.22$ , <i>SE</i> = 0.50, <i>p</i> = .001;<br><b>AGE:</b> $\beta = -0.26$ , $t(51) = -2.76$ , <i>SE</i> = 0.09, <i>p</i> = .008;<br><b>AGE*STATUS:</b> $\beta = 0.28$ , $t(51) = 3.41$ , <i>SE</i> = 0.08, <i>p</i> = .001;<br><b>AGE<sup>2</sup>:</b> $\beta = 0.03$ , $t(289) = 7.58$ , <i>SE</i> = 0.004, <i>p</i> < .001;<br><i>d</i> = 0.14 | <b>Intercept:</b> $\beta = 5.47$ , $t(289) = 7.72$ , <i>SE</i> = 0.71, <i>p</i> < .001;<br><b>IB:</b> $\beta = 0.01$ , $t(289) = 0.52$ , <i>SE</i> = 0.01, <i>p</i> = .607;<br><b>STATUS:</b> $\beta = -0.43$ , $t(289) = -0.72$ , <i>SE</i> = 0.59, <i>p</i> = .473;<br><b>AGE:</b> $\beta = 0.11$ , $t(51) = 0.75$ , <i>SE</i> = 0.15, <i>p</i> = .459;<br><b>AGE*STATUS:</b> $\beta = 0.22$ , $t(51) = 2.61$ , <i>SE</i> = 0.09, <i>p</i> = .012;<br><b>AGE<sup>2</sup>:</b> $\beta = 0.03$ , $t(289) = 5.07$ , <i>SE</i> = 0.01, <i>p</i> < .001;<br><i>d</i> = 0.06 | <b>Intercept:</b> $\beta = -2.64$ , $t(289) = -2.78$ , <i>SE</i> = 0.95, <i>p</i> = .006;<br><b>IB:</b> $\beta = 0.06$ , $t(289) = 4.02$ , <i>SE</i> = 0.02, <i>p</i> < .001;<br><b>STATUS:</b> $\beta = -0.47$ , $t(289) = -0.66$ , <i>SE</i> = 0.71, <i>p</i> = .512;<br><b>AGE:</b> $\beta = 3.71$ , $t(51) = 24.35$ , <i>SE</i> = 0.15, <i>p</i> < .001;<br><b>AGE*STATUS:</b> $\beta = 0.30$ , $t(51) = 4.11$ , <i>SE</i> = 0.07, <i>p</i> < .001;<br><b>AGE<sup>2</sup>:</b> $\beta = -0.06$ , $t(289) = -13.22$ , <i>SE</i> = 0.01, <i>p</i> < .001;<br><i>d</i> = 0.47 |
| Variability of Combined Behaviors (CB)   | <b>Intercept:</b> $\beta = 1.03$ , $t(51) = 1.42$ , <i>SE</i> = 0.73, <i>p</i> = .162;<br><b>CB:</b> $\beta = -0.06$ , $t(290) = -0.84$ , <i>SE</i> = 0.07, <i>p</i> = .400;<br><b>STATUS:</b> $\beta = 2.79$ , $t(51) = 3.26$ , <i>SE</i> = 0.86, <i>p</i> = .002;<br><b>AGE:</b> $\beta = 3.74$ , $t(290) = 25.36$ , <i>SE</i> = 0.15, <i>p</i> < .001;<br><b>AGE<sup>2</sup>:</b> $\beta = -0.07$ , $t(290) = -13.57$ , <i>SE</i> = 0.01, <i>p</i> < .001;<br><i>d</i> = 0.10 | <b>Intercept:</b> $\beta = -1.68$ , $t(51) = -3.27$ , <i>SE</i> = 0.51, <i>p</i> = .002;<br><b>CB:</b> $\beta = 0.27$ , $t(289) = 5.85$ , <i>SE</i> = 0.05, <i>p</i> < .001;<br><b>STATUS:</b> $\beta = 0.16$ , $t(51) = 0.32$ , <i>SE</i> = 0.50, <i>p</i> = .752;<br><b>AGE:</b> $\beta = 2.99$ , $t(289) = 32.14$ , <i>SE</i> = 0.09, <i>p</i> < .001;<br><b>AGE*STATUS:</b> $\beta = 0.11$ , $t(289) = 3.18$ , <i>SE</i> = 0.04, <i>p</i> = .002;<br><b>AGE<sup>2</sup>:</b> $\beta = -0.06$ , $t(289) = -20.84$ , <i>SE</i> = 0.003, <i>p</i> < .001;<br><i>d</i> = 0.69 | <b>Intercept:</b> $\beta = 7.78$ , $t(289) = 21.85$ , <i>SE</i> = 0.36, <i>p</i> < .001;<br><b>CB:</b> $\beta = 0.05$ , $t(289) = 1.21$ , <i>SE</i> = 0.04, <i>p</i> = .226;<br><b>STATUS:</b> $\beta = -1.58$ , $t(289) = -3.21$ , <i>SE</i> = 0.49, <i>p</i> = .001;<br><b>AGE:</b> $\beta = -0.25$ , $t(51) = -2.68$ , <i>SE</i> = 0.09, <i>p</i> = .010;<br><b>AGE*STATUS:</b> $\beta = 0.28$ , $t(51) = 3.45$ , <i>SE</i> = 0.08, <i>p</i> = .001;<br><b>AGE<sup>2</sup>:</b> $\beta = 0.03$ , $t(289) = 7.62$ , <i>SE</i> = 0.004, <i>p</i> < .001;<br><i>d</i> = 0.14 | <b>Intercept:</b> $\beta = 5.58$ , $t(289) = 8.31$ , <i>SE</i> = 0.67, <i>p</i> < .001;<br><b>CB:</b> $\beta = 0.02$ , $t(289) = 0.51$ , <i>SE</i> = 0.05, <i>p</i> = .610;<br><b>STATUS:</b> $\beta = -0.42$ , $t(289) = -0.71$ , <i>SE</i> = 0.58, <i>p</i> = .477;<br><b>AGE:</b> $\beta = 0.12$ , $t(51) = 0.85$ , <i>SE</i> = 0.14, <i>p</i> = .399;<br><b>AGE*STATUS:</b> $\beta = 0.23$ , $t(51) = 2.64$ , <i>SE</i> = 0.09, <i>p</i> = .011;<br><b>AGE<sup>2</sup>:</b> $\beta = 0.03$ , $t(289) = 5.17$ , <i>SE</i> = 0.01, <i>p</i> < .001;<br><i>d</i> = 0.06 | <b>Intercept:</b> $\beta = -1.44$ , $t(289) = -1.74$ , <i>SE</i> = 0.83, <i>p</i> = .083;<br><b>CB:</b> $\beta = 0.16$ , $t(289) = 2.32$ , <i>SE</i> = 0.07, <i>p</i> = .021;<br><b>STATUS:</b> $\beta = -0.27$ , $t(289) = -0.39$ , <i>SE</i> = 0.71, <i>p</i> = .700;<br><b>AGE:</b> $\beta = 3.87$ , $t(51) = 27.08$ , <i>SE</i> = 0.14, <i>p</i> < .001;<br><b>AGE*STATUS:</b> $\beta = 0.30$ , $t(51) = 4.18$ , <i>SE</i> = 0.07, <i>p</i> < .001;<br><b>AGE<sup>2</sup>:</b> $\beta = -0.07$ , $t(289) = -14.31$ , <i>SE</i> = 0.01, <i>p</i> < .001;<br><i>d</i> = 0.27 |



| pk_c... | fk_participa... | fk_visit | Assessment | Period | Behavior                   | Behavior_Duration | Behavior_Start_Ti... | Behavior_End_... |
|---------|-----------------|----------|------------|--------|----------------------------|-------------------|----------------------|------------------|
| 676042  | 112             | 6        | EXSIT      | KEYS   | look & touch body          | .33333333         | 25270                | 25290            |
| 676069  | 112             | 6        | EXSIT      | KEYS   | finger & look & touch body | 1.18333333        | 25290                | 25361            |
| 693656  | 112             | 6        | EXSIT      | KEYS   | look & touch body          | .73333333         | 25361                | 25405            |
| 676121  | 112             | 6        | EXSIT      | KEYS   | look                       | .91666667         | 25405                | 25460            |
| 676084  | 112             | 6        | EXSIT      | KEYS   | bang & look & touch body   | .01666667         | 25460                | 25461            |
| 676043  | 112             | 6        | EXSIT      | KEYS   | look & touch body          | .1                | 25461                | 25467            |
| 693648  | 112             | 6        | EXSIT      | KEYS   | look                       | .01666667         | 25467                | 25468            |
| 676122  | 112             | 6        | EXSIT      | KEYS   | look                       | 1.38333333        | 25520                | 25603            |
| 693649  | 112             | 6        | EXSIT      | KEYS   | look                       | .28333333         | 25603                | 25620            |
| 676044  | 112             | 6        | EXSIT      | KEYS   | touch body                 | .01666667         | 25707                | 25708            |
| 676085  | 112             | 6        | EXSIT      | KEYS   | bang & touch body          | .01666667         | 25708                | 25709            |
| 693650  | 112             | 6        | EXSIT      | KEYS   | touch body                 | 1.45              | 25709                | 25796            |
| 676008  | 112             | 6        | EXSIT      | KEYS   | transfer                   | 1.33333333        | 25811                | 25819            |
| 676123  | 112             | 6        | EXSIT      | KEYS   | look                       | 2.71666667        | 26157                | 26320            |
| 693651  | 112             | 6        | EXSIT      | KEYS   | look & touch body          | .01666667         | 26320                | 26321            |
| 676086  | 112             | 6        | EXSIT      | KEYS   | bang & touch body          | .01666667         | 26321                | 26322            |
| 676045  | 112             | 6        | EXSIT      | KEYS   | touch body                 | .03333333         | 26322                | 26324            |
| 676087  | 112             | 6        | EXSIT      | KEYS   | bang                       | .1                | 26356                | 26362            |
| 676046  | 112             | 6        | EXSIT      | KEYS   | bang & touch body          | .03333333         | 26362                | 26364            |
| 693652  | 112             | 6        | EXSIT      | KEYS   | bang                       | .53333333         | 26364                | 26396            |
| 676047  | 112             | 6        | EXSIT      | KEYS   | bang & touch body          | .1                | 26396                | 26402            |
| 693653  | 112             | 6        | EXSIT      | KEYS   | bang                       | .38333333         | 26402                | 26425            |
| 676048  | 112             | 6        | EXSIT      | KEYS   | touch body                 | .21666667         | 26427                | 26440            |
| 676124  | 112             | 6        | EXSIT      | KEYS   | look                       | .23333333         | 26555                | 26569            |
| 693654  | 112             | 6        | EXSIT      | KEYS   | look & touch body          | .41666667         | 26569                | 26594            |
| 676049  | 112             | 6        | EXSIT      | KEYS   | touch body                 | 1.93333333        | 26594                | 26710            |
| 676050  | 112             | 6        | EXSIT      | KEYS   | bang & touch body          | .18333333         | 26738                | 26749            |
| 676088  | 112             | 6        | EXSIT      | KEYS   | bang                       | .4                | 26749                | 26773            |
| 676051  | 112             | 6        | EXSIT      | KEYS   | touch body                 | .11666667         | 26773                | 26780            |
| 676089  | 112             | 6        | EXSIT      | KEYS   | move                       | .63333333         | 26804                | 26842            |
| 676125  | 112             | 6        | EXSIT      | KEYS   | look                       | .53333333         | 26990                | 27022            |
| 676052  | 112             | 6        | EXSIT      | KEYS   | look & touch body          | .65               | 27022                | 27061            |
| 693655  | 112             | 6        | EXSIT      | KEYS   | look                       | .15               | 27061                | 27070            |

Figure S1. This screenshot from the Filemaker Pro Advanced custom database (Filemaker, Inc., Santa Clara, CA) shows data for one participant (112) exploring one toy (KEYS) in the object exploration in sitting assessment (EXSIT) after the database combined the data to identify any overlapping behaviors. The behaviors are listed in order of occurrence. Note that some behaviors occurred in isolation (i.e., individual behavior) while others occurred simultaneously (i.e., combined behaviors). Each row from this example constitutes one bout of behavior.

## OBJECT EXPLORATION - CODING PROTOCOL

### Summary of the Task: Object Exploration in Sitting

The goal of the object exploration task is to assess exploration amount and variability in young infants. Object exploration behaviors are the behaviors infants perform on objects to learn about their properties and how they can manipulate them. These behaviors provide infants with information they can later use to categorize similar objects and to discriminate different objects. These abilities are foundational for later motor, language, and cognitive development.

The object exploration assessment consists of seven presentations of different toys (**KEYS** – ring with keys, **BRING** – beaded ring, **MAR** - maraca, **ORING** – orange ring, **SRING** – soft ring, **CRAB** – soft crab, **BALL** – rubbery spiky ball) to the infant in sitting position. Each trial lasts up to 30 sec or until the infant has dropped/released the object three times. We code object exploration behaviors using OpenSHAPA.

### **PASS 1 (column 1): SUBJECT INFORMATION**

Subject's ID and visit.

### **PASS 2 (column 2): ASSESSMENT PERIODS**

The assessment period is marked as EXSIT (exploration in sitting).

### **PASS 3 (column 3): PERIODS WITHIN EACH ASSESSMENT**

Each toy has a dedicated period, make sure you code within the specified periods.

### **PASS 4 (column 4): HOLDING**

We are interested in what infants are doing with objects when they are holding them so the first step is determining when within each trial/period an infant is holding the object. You will code each toy period lasting up to 30 sec or until the infant releases the object three times. You will perform this pass at quarter to half speed so you can get accurate start and end times.

In this pass you will code for:

- **Holding object with right hand (right hold):** The infant is holding the object just with the right hand.

- **Holding object with left hand (left hold):** The infant is holding the object just with the left hand.
- **Holding object with both hands (bilateral hold):** The infant is holding / contacting the object with both hands. Note that because it will be hard to determine for coding whether both hands are actually supporting the object versus one hand holding and supporting the weight of the object while the other is just touching or manipulating it, we will code any times both hands are contacting the object as bilateral holding.

If the object is placed in the infant's hand and the infant immediately drops it, do not count any time as holding, but rather count it as an immediate release. As infants get older and gain control, they might let go of an object and then re-acquire it again. This occurrence would not count as one of the 3 releases that will result in the end of a trial. Again, the trial can last up to 30 sec or until the infant releases the object 3 times.

**FROM THIS POINT ON, YOU WILL ONLY CODE TIMES WITHIN PERIODS WHERE THE INFANT WAS HOLDING THE OBJECTS.** You will not code times when the object was not held by the infant, such as when the object was released and being placed back in the infant's hand.

#### **PASS 5 (column 5): MANIPULATE**

You will code times the infant manipulates the object. By definition, manipulation requires use of both hands so you will only code times of bilateral holding. You will perform this pass watching at full speed since the infants do not perform these behaviors often. If you find the infant performs them frequently, you can watch the video at quarter to half speed. Make sure you pause and review as needed to get accurate start and end times.

In this pass you will code:

- **Fingering the object (finger):** The infant's fingers move over the surface of the object for at least 2 sec.
- **Banging the object (bang):** The object contacts a surface or the child's body in a repetitive manner.
- **Manipulating the object (manipulate):** The infant's one hand moves part(s) of the object as it is supported by the other hand.
- **Transferring the object from one hand to the other (transfer):** The infant moves the object from one hand to the other.

**PASS 6 (column 6): OBJECT TOUCHING BODY**

You will code times when the object touches the infant's body. You will perform this pass watching at full speed, slowing down to record exact times for the beginning and end of the period.

In this pass you will code:

- **Object touching body (touch body):** The infant brings the object into contact with a part of his/her body, including the head, face, trunk, arms, and legs, but excluding the mouth and other hand.

**PASS 7 (column 7): MOUTHING**

You will code periods when the object is in contact with mouth/tongue/lips or any other part of the face. You will perform this pass at real-time speed, not slowed down. Your goal is to watch the video continuously through. You can rewind at times if needed and watch parts slowed down to quarter or half speed or multiple times as needed to get accurate start and end times.

- **Touching mouth (mouth):** The object is being in contact with the mouth, tongue, and/or lips.

**PASS 8 (column 8): LOOKING**

You will code periods when the infant is looking at the object. You will perform this pass at quarter to half speed. Your goal is to watch the video continuously through.

- **Looking at the object (look):** The infant's eyes are directed towards the object. If you are unsure, listen for cues from the experimenter, such as "good job looking at the toy" or "are you looking at me?" If you are still unsure, do not count it as looking.

**GENERAL NOTES:**

For all of the actions you are coding, look for each action in its own pass regardless of what other actions are occurring. When you have completed your coding for a baby's visit, review your coding to make sure that none of your behaviors occurred outside (before or after) the time boundaries (onset and offset) of the assessment duration sub-periods (column 3) and the holding times (column 4) you were coding. It is easiest to perform this in the temporal view of the OpenSHAPA.
